# Supplementary material for: Interfacial and electronic modulation of FeP–CoP on reduced graphene aerogel boosts bifunctional catalysis for overall water splitting
Source: Royal Society of Chemistry journal article supplement (doi:10.1039/d5ta06920c), 2025-11-12
Supplement: d5ta06920c1.pdf [file d5ta06920c1.pdf]

**Supporting Information**

**Interfacial and Electronic Modulation of FeP-CoP on**

**Reduced Graphene Aerogel Boosts Bifunctional Catalysis**

**for Overall Water Splitting**

Yifeng Xue <sup>a</sup>, Mingyue Qiu <sup>a</sup>, Jie Luo <sup>a</sup>, Hongke Qiao <sup>b</sup>, Tianyi Yang <sup>a</sup>, Hong Chen <sup>a</sup>,  
Guiyu Zhu <sup>a</sup>, Xiaoli Li <sup>c</sup>, Lu Zou <sup>a</sup>, Xiaoxiao Zhang <sup>a</sup>, Jianzhi Wang <sup>a,\*</sup>, Faquan Yu <sup>a,\*</sup>

<sup>a</sup> Key Laboratory for Green Chemical Process of Ministry of Education,

Hubei Key Laboratory for Novel Reactor and Green Chemistry Technology,

State Key Laboratory of Green and Efficient Development of Phosphorus Resources,

School of Chemical Engineering and Pharmacy, Wuhan Institute of Technology,

Wuhan 430205, Hubei, China

<sup>b</sup> School of Chemistry and Chemical Engineering, Ningxia University,

Ningxia 75300, China

<sup>c</sup> College of Earth and Environmental Sciences, Lanzhou University,

Lanzhou, 730000, China

\*Corresponding authors. E-mail addresses: [wangjz15@163.com](mailto:wangjz15@163.com), [fyu@wit.edu.cn](mailto:fyu@wit.edu.cn)

## 24 Additional Experimental Details

25

## 26 Samples preparation

27 **Materials.** All chemicals involved in the experiments were of analytical grade without  
28 further purification.  $\text{Co}(\text{NO}_3)_2 \cdot 6\text{H}_2\text{O}$ ,  $\text{Fe}(\text{NO}_3)_3 \cdot 9\text{H}_2\text{O}$ ,  $\text{CH}_4\text{N}_2\text{O}$ ,  $\text{NH}_4\text{F}$ ,  $\text{C}_2\text{H}_5\text{OH}$ ,  
29  $\text{KOH}$  were bought from Sinopharm Chemical Reagent Co., Ltd,  $\text{K}_3\text{Fe}(\text{CN})_6$  was bought  
30 from Macklin, Graphite oxide (GO) was purchased from Sixth Element (Changzhou)  
31 Materials Technology Co., Ltd. The material had a water content of  $\leq 6$  wt%, and its  
32 complete specifications are provided in **Table S16**. Hydrochloric acid (HCl) and  
33  $\text{NaH}_2\text{PO}_2 \cdot \text{H}_2\text{O}$  were bought from Shanghai Aladdin Biochemical Technology Co., Ltd.  
34 The NF (99.8%) from Cyber Electrochemical Materials Network; The water used in all  
35 experiments was filtered through an ion-exchange membrane.

36 **Synthesis of rGA/NF.** First, Graphene oxide powder was reduced by tube furnace at  
37  $200^\circ\text{C}$  for 7h, then, the NF ( $1\text{ cm} \times 2.5\text{ cm}$ ) was successively treated by 3 M HCl  
38 solution, ethanol and water for 10 min to remove surface impurities. Next, the freshly  
39 cleaned NF was then reacted in 50 mL of a 1.5 mg/mL rGO solution at  $120^\circ\text{C}$  for 8 h  
40 under slow rotation in a homogeneous reactor. The resulting rGA/NF was taken out and  
41 washed with water thoroughly before being vacuum-dried.

42 **Synthesis of CoCH@rGA/NF Precursor on rGA/NF.** 4.5 mmol  $\text{Co}(\text{NO}_3)_2 \cdot 6\text{H}_2\text{O}$ ,  
43 14.25 mmol  $\text{CH}_4\text{N}_2\text{O}$ , 11.4 mmol  $\text{NH}_4\text{F}$  were dissolved in 50 ml DI water to form a  
44 clear solution. Then the clear solution and the piece of rGA/NF were poured into a  
45 Teflon-lined autoclave and then heated at  $120^\circ\text{C}$  for 10 h. After dropping to room  
46 temperature, the precursor was rinsed with DI water for several times, and then placed  
47 in a vacuum drying oven at  $60^\circ\text{C}$  to dry for 24 h.

48 **Synthesis of Co-Fe PBA@rGA/NF Precursor.** 0.15 g  $\text{K}_3\text{Fe}(\text{CN})_6$  was dissolved in 20  
49 ml DI water under stirring. And  $\text{CoCH@rGA/NF}$  was put into the solution and heated  
50 at 80 °C for 24 h. After dropping to room temperature, the precursor was rinsed with  
51 DI water for several times, and then placed in a vacuum drying oven at 60 °C to dry for  
52 24 h.

53 **Synthesis of CoP-FeP@rGA/NF.** 1.0 g  $\text{NaH}_2\text{PO}_4 \cdot \text{H}_2\text{O}$  was used as the P source and it  
54 was placed at the upstream side of a tube furnace with the Co-Fe PBA@rGA/NF  
55 precursor which was put at the center. Next, Co-Fe PBA@rGA/NF precursor was  
56 annealed at 350 °C under argon atmosphere for 2 h in tube furnace, with a heating rate  
57 of 2 °C  $\text{min}^{-1}$ .

58 **Synthesis of CoP-FeP/NF.** The synthesis process is the same as for CoP-  
59 FeP@rGA/NF except that rGA is not used.

60 **Synthesis of CoP@rGA/NF.** The synthesis process is the same as for CoP-  
61 FeP@rGA/NF except that  $\text{K}_3\text{Fe}(\text{CN})_6$  is not used.

62 **Synthesis of FeP@rGA/NF.** The synthesis process is the same as for CoP-  
63 FeP@rGA/NF, but with  $\text{Co}(\text{NO}_3)_2 \cdot 6\text{H}_2\text{O}$  replaced by  $\text{Fe}(\text{NO}_3)_3 \cdot 9\text{H}_2\text{O}$  as the metal  
64 precursor.

65

## 66 **Characterization**

67 X-ray diffraction (XRD) patterns were recorded on RigakuD/Max2550 in the range of  
68 5-90 using  $\text{Cu-K}\alpha$  radiation. Due to the overwhelming interference from the Ni foam  
69 (NF) substrate, we adopted a modified sample preparation method to accurately  
70 characterize the crystal structure of the synthesized catalysts while retaining the NF  
71 substrate as an internal reference. Specifically, most of the catalyst powder was carefully  
72 scraped off the NF substrate, but a small portion of NF was deliberately retained during

73 the XRD measurement. The microscopic structures of materials were intuitively  
74 observed by Field emission scanning electron microscopy (FESEM) on a ZEISS Gemini  
75 300 microscope at 3 kV. The microstructure of the materials was observed by high-  
76 resolution transmission electron microscopy (HRTEM) on JEOL JEM-2100F. The  
77 surface composition of the sample was determined by X-ray photoelectron spectroscopy  
78 (XPS) on AXIS-ULTRA DLD using Al-K $\alpha$  radiation, and the C 1s peak of contaminant  
79 carbon at 284.8 eV was adopted for calibrating the binding energies. The attenuated  
80 total reflectance surface-enhanced infrared absorption spectroscopy (ATR-SEIRAS)  
81 experiments were taken with a Thermo Nicolet 8700 spectrometer equipped with a MCT  
82 detector cooled by liquid nitrogen.

### 83 **Electrochemical tests**

84 All electrochemical measurements were performed on a Shanghai Chenhua CHI760e  
85 electrochemical workstation in a three-electrode configuration, in which the prepared  
86 catalyst was used as the working electrode, the mercury oxide electrode was used as  
87 the reference electrode, and the graphite rod was used as the counter electrode. All  
88 prepared catalysts were tested in 1 M potassium hydroxide (KOH) solution at room  
89 temperature (25 °C), activated using cyclic voltammetry (CV) at 50 mV s<sup>-1</sup> to obtain  
90 stable CV curves, HER activities were evaluated using linear sweep voltammetry at  
91 10 mV s<sup>-1</sup> and OER activities were evaluated using linear sweep voltammetry at 10  
92 mV s<sup>-1</sup>. Electrochemical impedance spectroscopy (EIS) measurements at overpotentials  
93 of 50 mV and 350 mV for HER and OER.

### 94 **Electrochemical active surface area (ECSA) calculations**

95 Electrochemical active surface areas (ECSAs) was calculated from the double layer  
96 capacitance ( $C_{dl}$ ) charging curves, which was obtained from the CV curves measured  
97 in a potential scope without redox process. All potentials are corrected by 85% iR. In

98 the HER test, the double-layer capacitances ( $C_{dl}$ ) of synthesized samples were derived  
 99 from their cyclic voltammetry (CV) plots at the scan rates of 20 to 100 mV s<sup>-1</sup> in the  
 100 range of 0.124-0.224 V vs RHE in 1M KOH solution, and in the OER test, they were  
 101 derived from their cyclic voltammetry (CV) plots at the scan rates of 20 to 100 mV  
 102 s<sup>-1</sup> in the range of 0.924-1.024 V. The electrochemical surface area (ECSA) is  
 103 proportional to  $C_{dl}$ , based on the equation:

$$104 \quad ECSA = C_{dl}/C_s$$

105 The specific capacitance ( $C_s$ ) was chosen as 0.6 mF cm<sup>-2</sup> in 1 M KOH, based on typical  
 106 values reported for carbon-based materials (e.g., graphene, carbon nanotubes), owing to  
 107 their high electric double-layer capacitance. .

#### 108 **Turnover Frequency (TOF) calculations**

109 The loading masses of FeP-CoP@rGA and FeP-CoP catalysts on the NF substrate (with  
 110 dimensions of 1 cm × 2.5 cm, yielding a total geometric area of 5 cm<sup>2</sup> by accounting  
 111 for both sides) are 109 mg and 115.2 mg (**Table s1** and **Table s2**), corresponding to  
 112 loadings of 21.8 mg cm<sup>-2</sup> and 23.04 mg cm<sup>-2</sup>, respectively.

113 Approximately 10 mg of the catalyst sample was accurately weighed and dissolved  
 114 completely in 4 mL of concentrated nitric acid to obtain a clear solution. The digested  
 115 solution was then transferred and diluted to the mark in a 1 L volumetric flask, followed  
 116 by thorough mixing. The concentrations of Fe and Co in this solution were determined  
 117 using an Model Agilent 5800 Inductively coupled plasma optical emission  
 118 spectroscopy (ICP-OES).

119 Using the equation below, the catalysts' TOFs were determined; <sup>1</sup>

$$120 \quad TOF = \frac{JA}{4FN_s}$$

121 Where  $J$  is the current density at the potential,  $A$  is the surface area of the catalyst,  $n$  is  
122 the number of transferred electrons,  $F$  is the Faraday constant ( $96485 \text{ C mol}^{-1}$ ), and  
123  $N_s$  is the molar weight of active site in the catalyst. It should be noted that the TOF  
124 values reported in this work are estimated based on the total number of metal atoms,  
125 representing a conservative lower limit. This is because the bulk atoms and potentially  
126 some surface atoms of the catalyst may not be electrochemically active.

127

## 128 **Computation detail**

129 ***DFT computational methods.*** All density functional theory (DFT) calculations were  
130 performed using the Vienna Ab initio Simulation Package (VASP). The projector  
131 augmented wave (PAW) method and the Perdew-Burke-Ernzerhof (PBE) exchange-  
132 correlation functional within the generalized gradient approximation (GGA) were  
133 employed. A plane-wave energy cutoff of 400 eV was used. For geometric structure  
134 optimization, due to the large size of the simulation cell, only the K-point was used for  
135 sampling the Brillouin zone. The structures were relaxed until the forces on all atoms  
136 were less than 0.01 eV/Å.

## 137 **Electronic Structure Calculation**

138 The electronic density of states (DOS) was computed through static self-consistent field  
139 (SCF) calculations based on the optimized geometry. These calculations were  
140 performed using spin-polarized density functional theory (DFT) as implemented in the  
141 VASP code. The tetrahedron method with Blöchl corrections (ISMEAR = -5) was  
142 employed for accurate DOS integration over the Brillouin zone. The projection of the  
143 DOS onto specific atoms or orbitals was analyzed using the LORBIT = 11 option.

144 Owing to the large size of the computational model, a  $1 \times 1 \times 1$  k-point mesh was used  
145 for structural optimization to ensure computational efficiency. For the subsequent self-  
146 consistent electronic structure calculations (e.g., for computing the density of states), a  
147 denser  $3 \times 3 \times 1$  k-point mesh was employed to achieve sufficient accuracy in Brillouin  
148 zone sampling. We constructed cells of FeP (011) and CoP (011) surfaces by cutting  
149 CoP unit cells. The optimized cell parameters are obtained as  $14.76 \times 9.84 \times 27.74$  Å,  $a =$   
150  $b = c = 90^\circ$  for FeP-CoP (011),  $14.76 \times 9.84 \times 27.74$  Å,  $a = b = c = 90^\circ$  for FeP-  
151 CoP@rGA(011) heterojunction (Figure S20). A vacuum slab of more than 15 Å was

152 inserted in the z direction for all models to avoid the influence of the interaction  
 153 between adjacent periodic units. The K-point samplings of the Brillouin zone for  
 154 different models were listed in Table S3.

155 **OER reaction mechanism.** The OER Gibbs energies were calculated by applying DFT  
 156 in combination with the computational standard hydrogen electrode (SHE) model. (U =  
 157 0 V, pH = 0, p = 1 bar, and T = 298.15K). Based on adsorbate evolution mechanism  
 158 (AEM), followed concerted reaction path was considered.

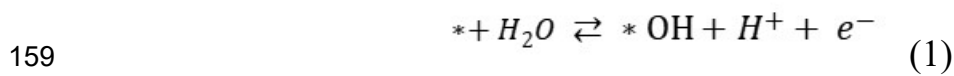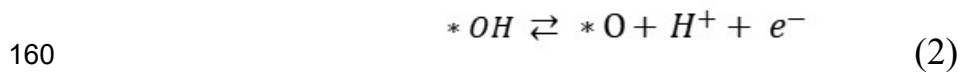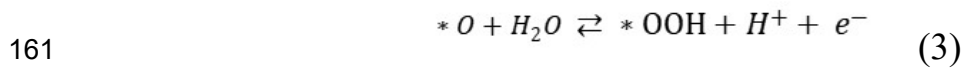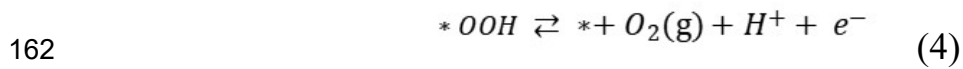

163 Where the chemical potential of the  $H^+/e^-$  is considered to estimate half of the gaseous  
 164  $H_2$  and the  $H_2O$  molecule is considered at liquid atmospheric pressure (0.035 bar and  
 165 T=298.15 K).

$$166 \quad \mu_{H^+} + \mu_{e^-} = 1/2 \mu_{H_2(g)} \quad (5)$$

$$167 \quad \mu_{H_2(g)} = E_{DFT}^{H_2(g)} + ZPE_{H_2(g)} - TS_{H_2(g)}^0 \quad (6)$$

$$168 \quad \mu_{H_2O(l)} = E_{DFT}^{H_2O(l)} + ZPE_{H_2O(l)} - TS_{H_2O(l)}^0 \quad (7)$$

169 Where ZPE and S represent the zero-point energy correction and entropy,  
 170 respectively, which are obtained from the analysis of the vibration frequency of the  
 171 molecules.

172 ***HER reaction mechanism.*** The HER pathway was calculated in detail according to  
173 the electrochemical framework developed by Nørskov and his co-workers.

174 The Gibbs free energies of H adsorption were calculated as follow:

175 
$$\Delta G_{H^*} = \Delta E_{H^*} + \Delta ZPE - T\Delta S = E(H^*) - E(^*) - E(H_2)/2 + \Delta ZPE - T\Delta S$$

176

## Supporting Figures and Tables

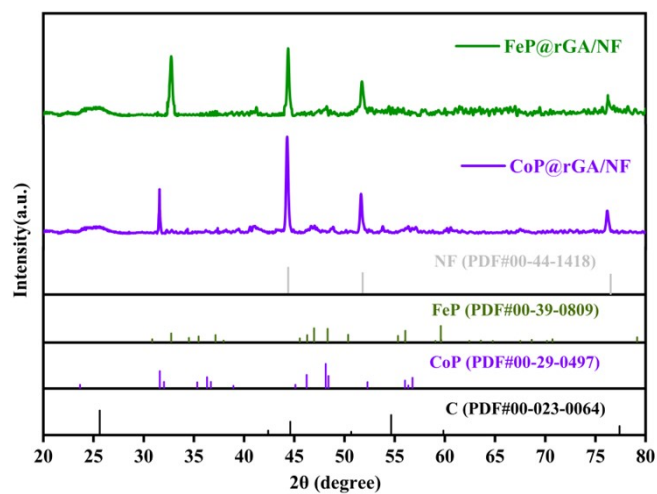

177

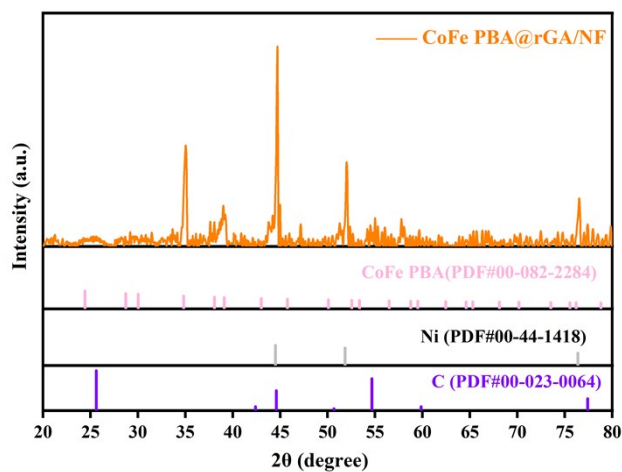

178

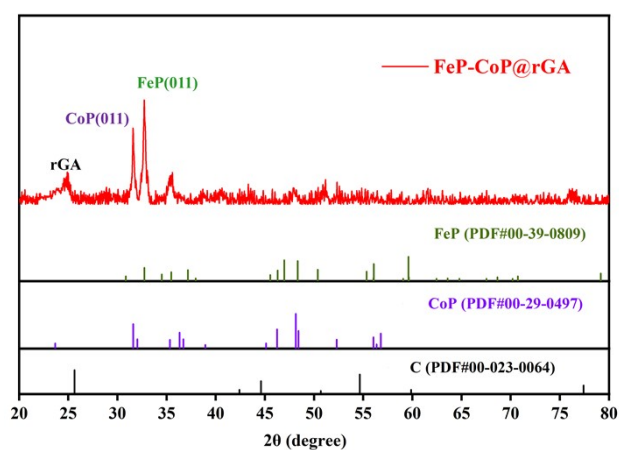

179

180 **Fig. S1.** XRD of FeP@rGA/NF, CoP@rGA/NF, Co-Fe PBA@rGA/NF and FeP-

181

CoP@rGA



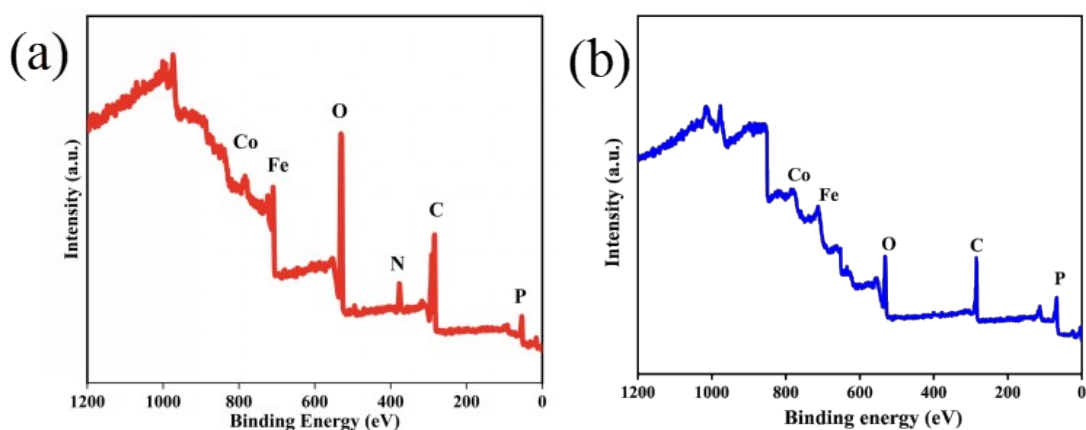

**Fig. S2.** XPS survey pattern of (a) FeP-CoP@rGA/NF and (b) FeP-CoP/NF.

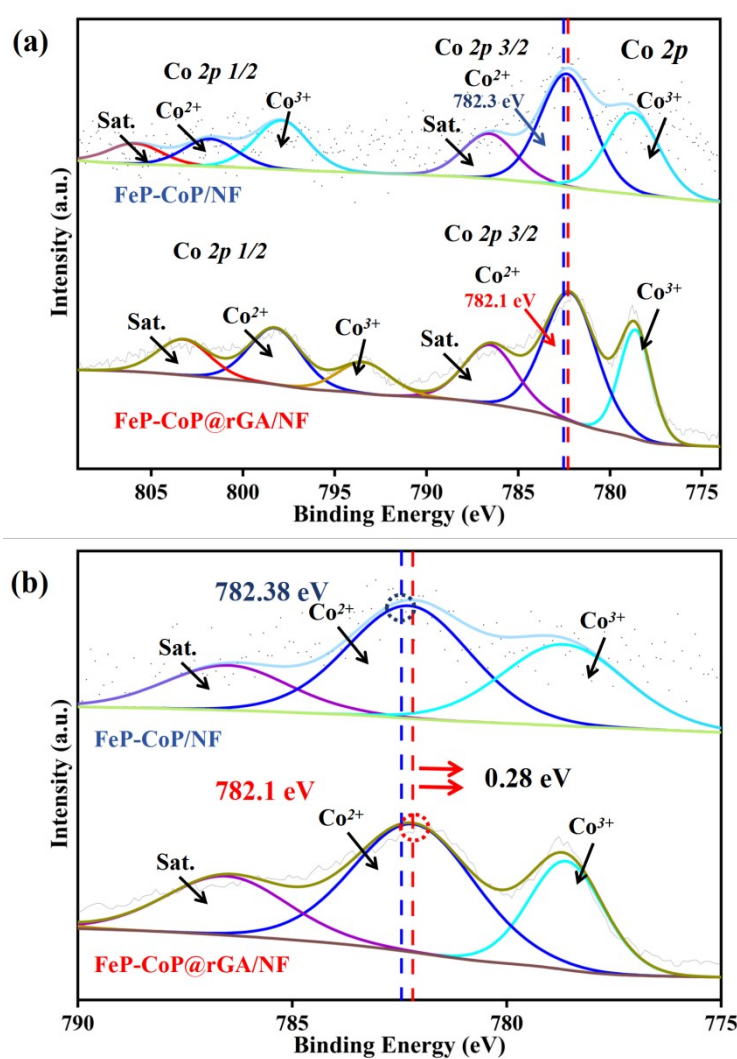

**Fig. S3.** The High-resolution XPS spectra difference of Co 2p between FeP-CoP/NF and FeP-CoP@rGA/NF

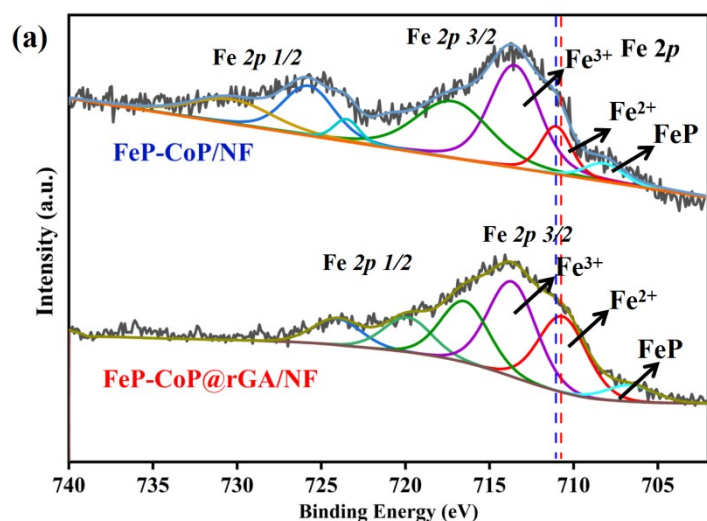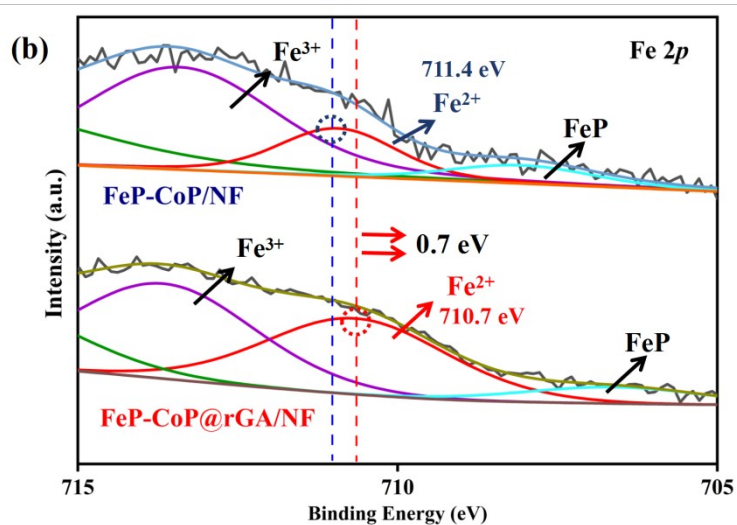

**Fig. S4.** The High-resolution XPS spectra difference of Fe 2p between FeP-CoP/NF and FeP-CoP@rGA/NF

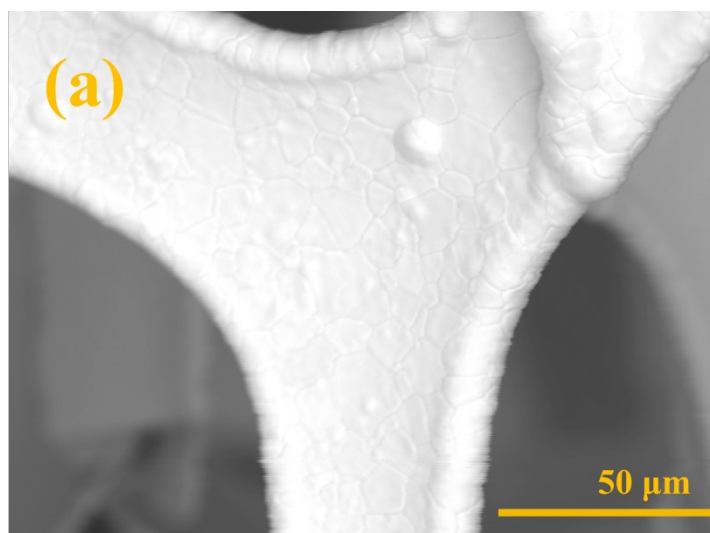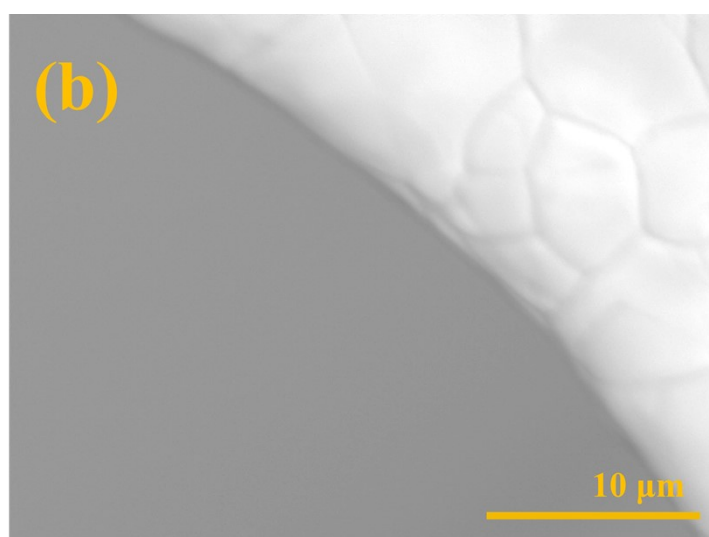

**Fig. S5.** SEM images of NF.

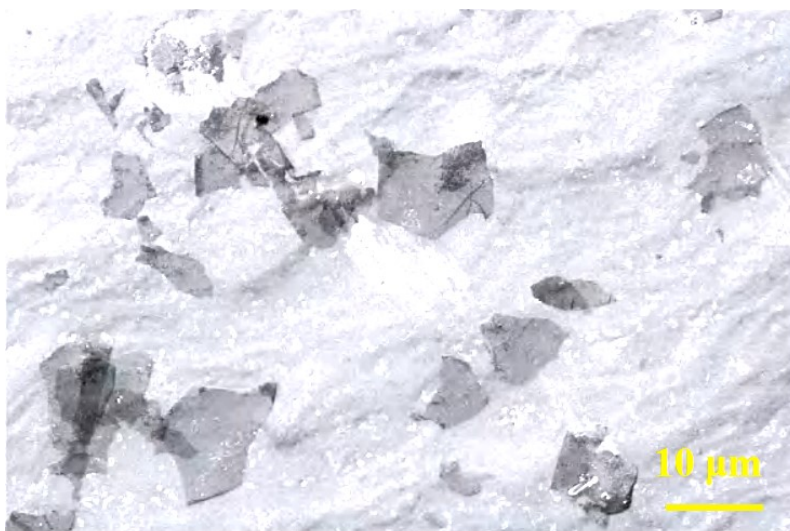

**Fig. S6.** SEM image of rGA (without NF).

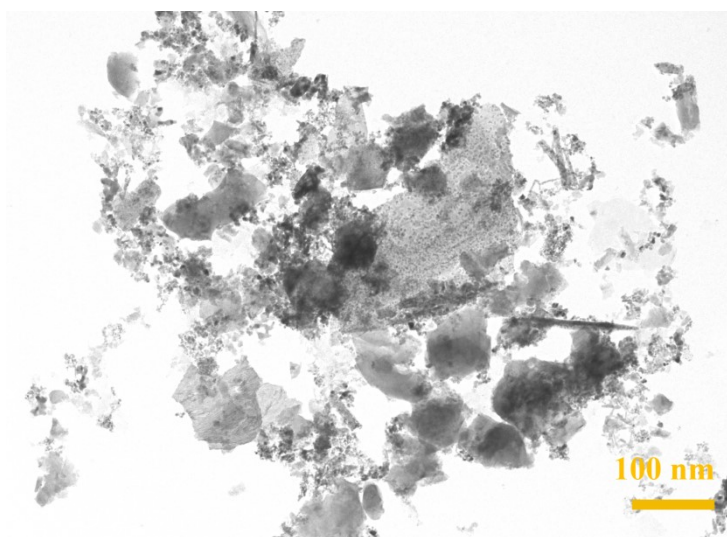

**Fig. S7.** TEM image of rGA (without NF).

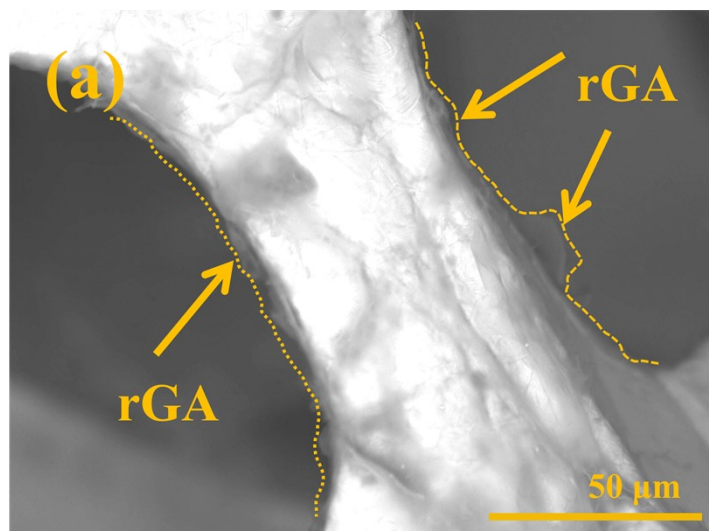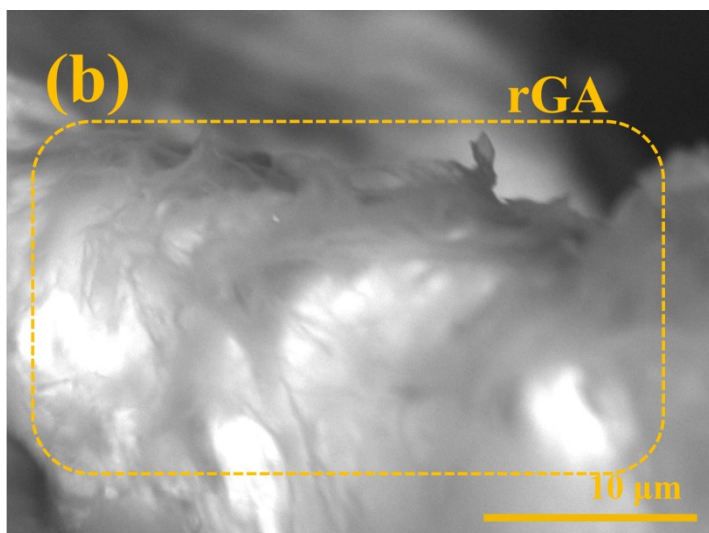

**Fig. S8.** SEM images of rGA/NF.

211

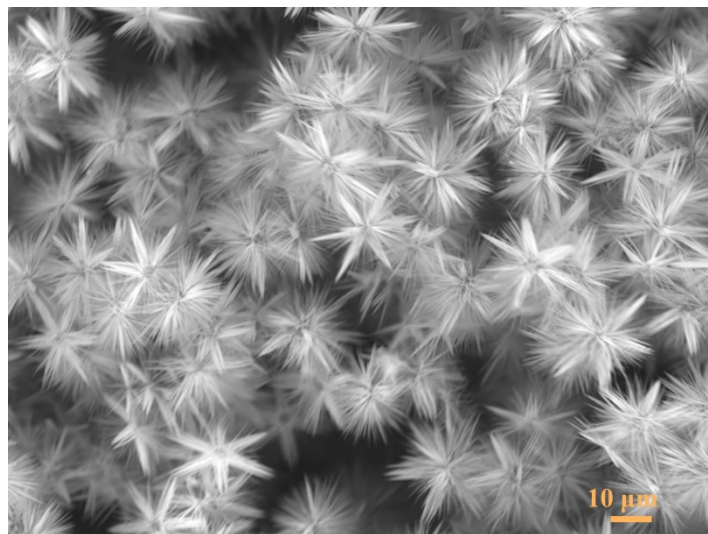

212

213

**Fig. S9.** SEM image of CoP@rGA/NF.

214

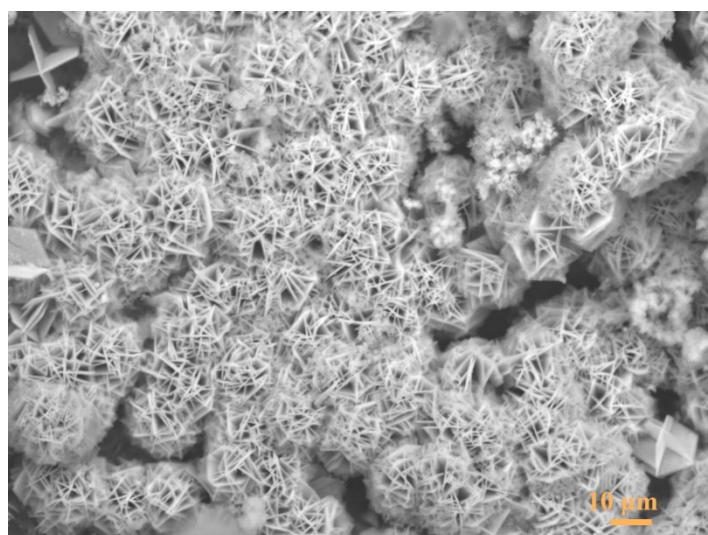

215

216

**Fig. S10.** SEM image of FeP@rGA/NF.

217

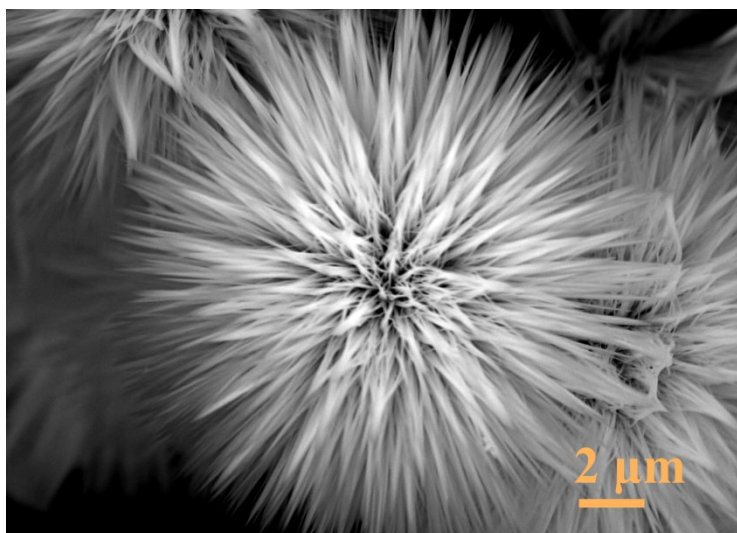

218

219

**Fig. S11.** SEM image of CoCH/NF at 2 μm

220

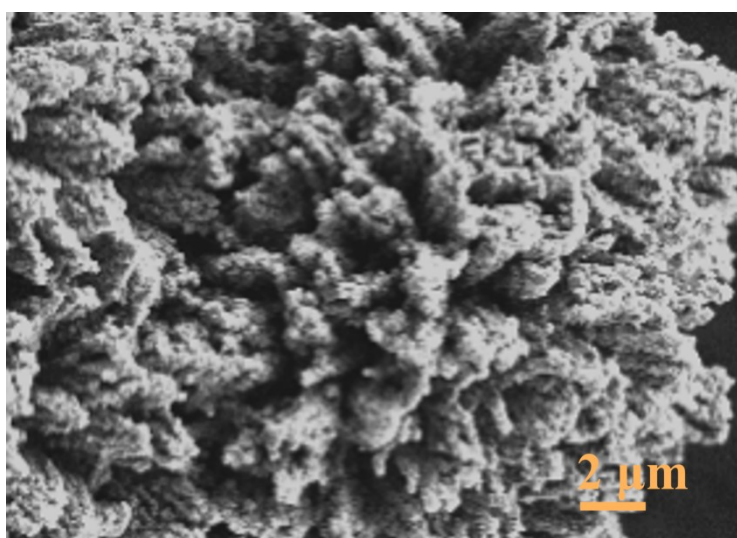

221

222

**Fig. S12.** SEM image of Co-Fe PBA/NF at 2 μm

223

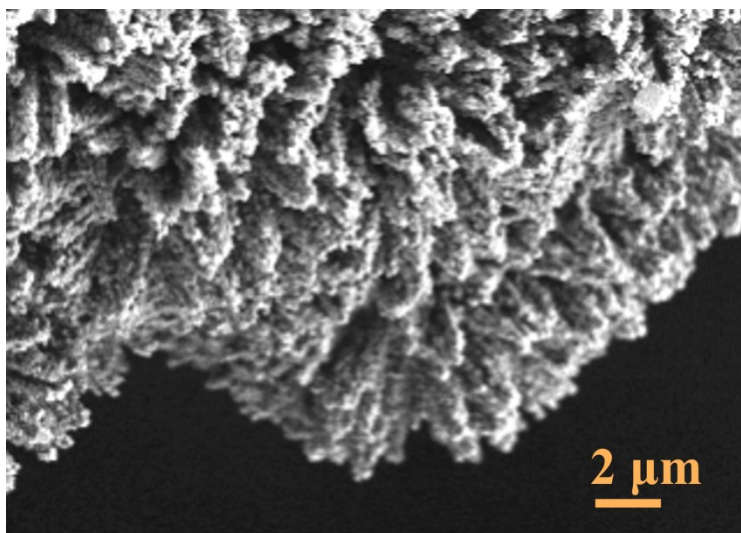

224

225

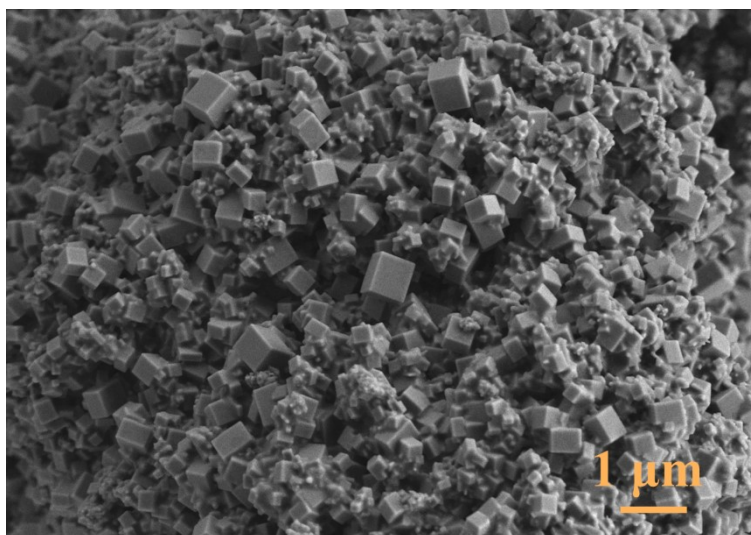

226

227

228

**Fig. S13.** SEM images of FeP-CoP/NF at 2 μm and 1 μm

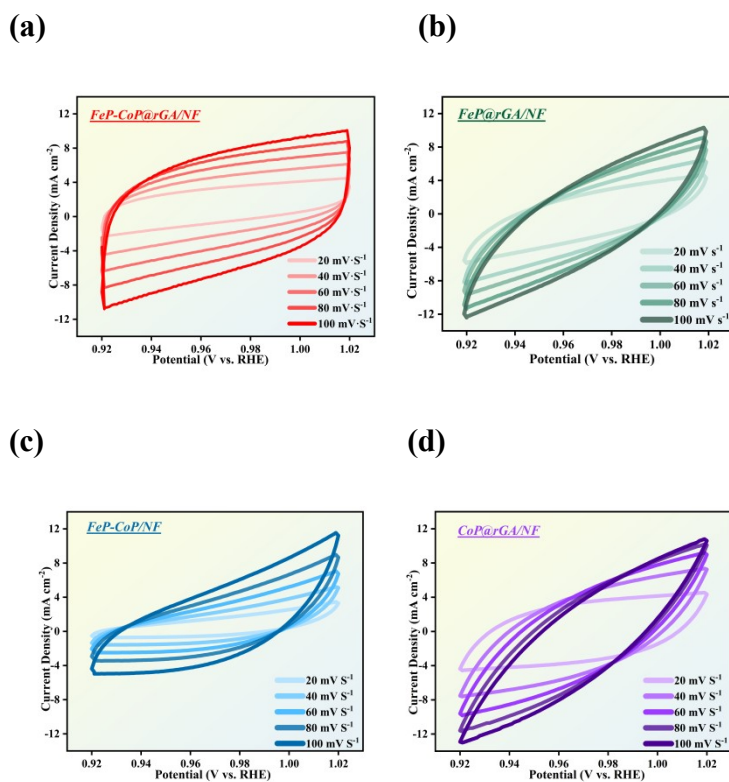

**Fig. S14.** Cyclic voltammograms of with the non-Faradaic potential regions from 20-100 mV/s for (a) FeP-CoP@rGA/NF, (b) FeP@rGA/NF, (c) FeP-CoP/NF and (d) CoP@rGA/NF.

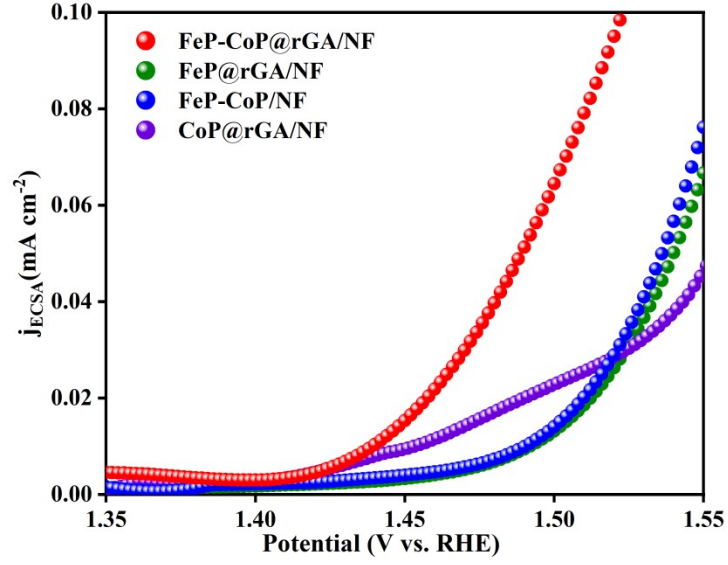

239

240 **Fig. S15.** Polarization curves of different catalysts for OER in 1M KOH electrolyte

241 normalized by ECSA. The specific capacitance ( $C_s$ ) was chosen as  $0.6 \text{ mF cm}^{-2}$  in 1 M

242 KOH, based on typical values reported for carbon-based materials (e.g., graphene,

243 carbon nanotubes), owing to their high electric double-layer capacitance. The ECSA of

244 the catalyst layer can be calculated ( $\text{ECSA} = \text{CdI}/C_s$ ).

245

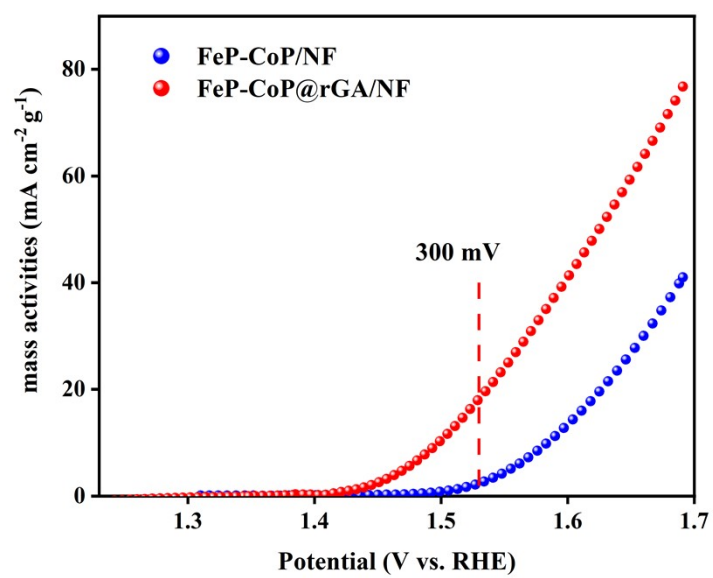

**Fig. S16.** Mass activities curves of OER derived from LSV curves.

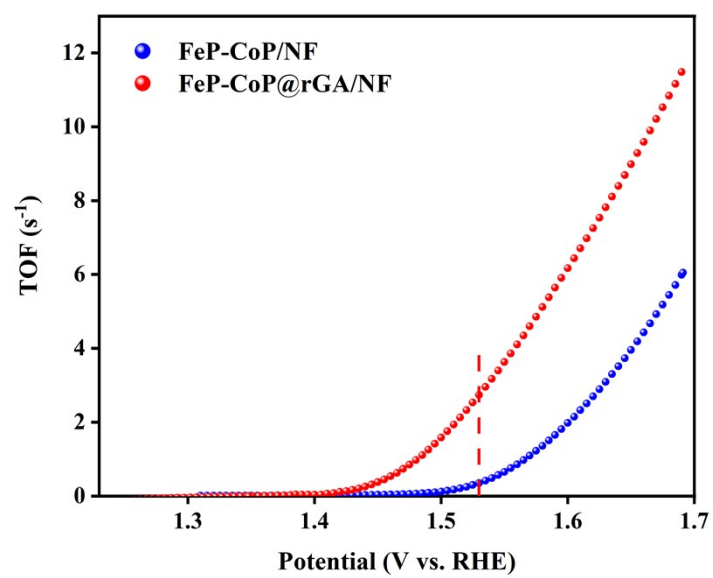

**Fig. S17.** TOF curves of OER derived from LSV curves.

252  
253  
254  
255  
256  
257  
258  
259

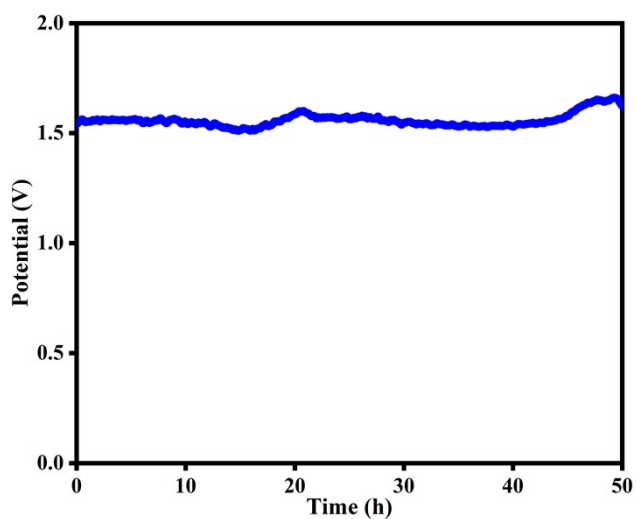

260  
261  
262  
263  
264

**Fig. S18.** Chronopotentiometric stability test of FeP-CoP/NF at  $j = 50 \text{ mA cm}^{-2}$  for 50 h.

265

266

267

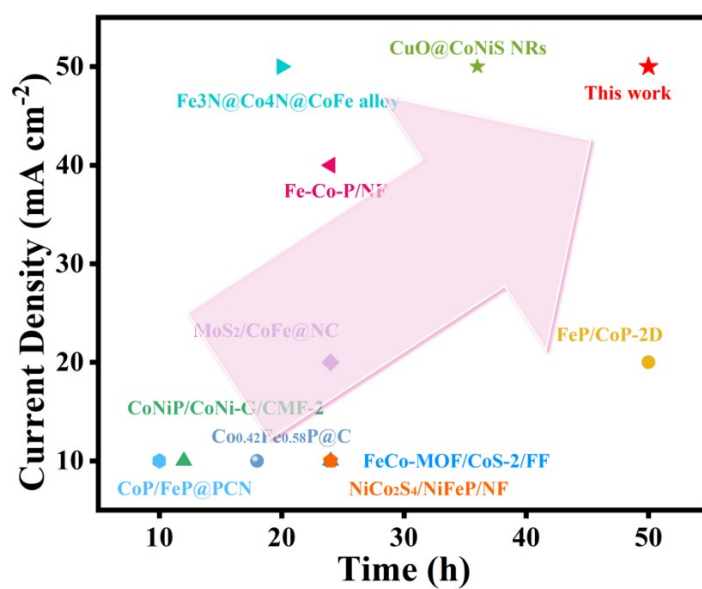268 **Fig. S19.** Comparison of the current density and time for stability between this

269 work and previously reported Fe-Co based catalysts.

270

271

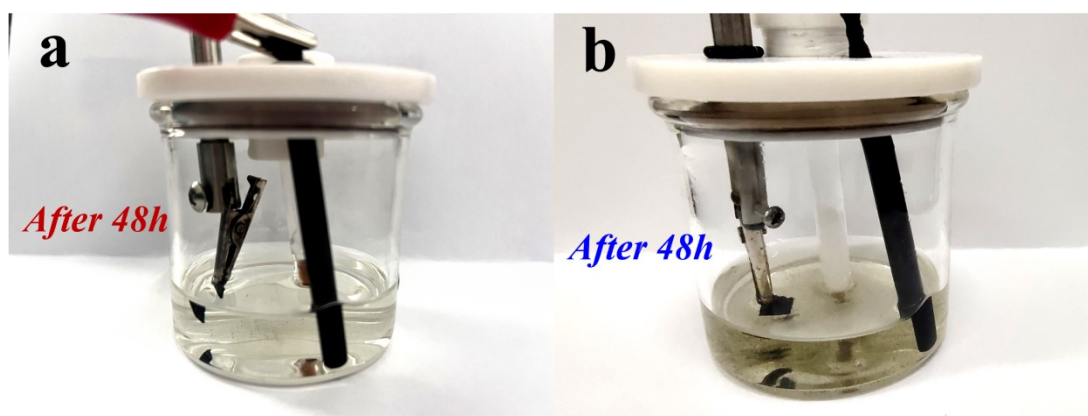

272

273 **Fig. S20.** Comparison of electrolyte conditions after stability test: (a) FeP-

274 CoP@rGA/NF; (b) FeP-CoP/NF.

275

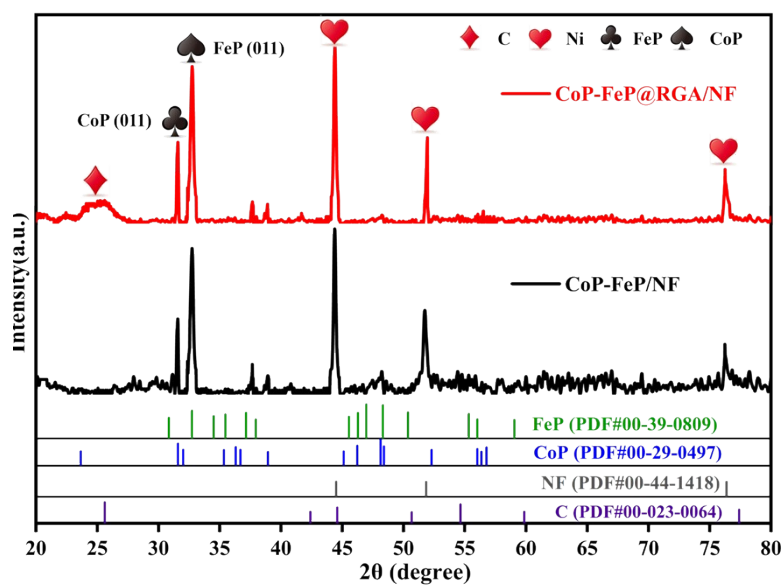

276

277 **Fig. S21.** XRD pattern of FeP-CoP@rGA/NF and FeP-CoP/NF after stability test.

278

279

280

281

282

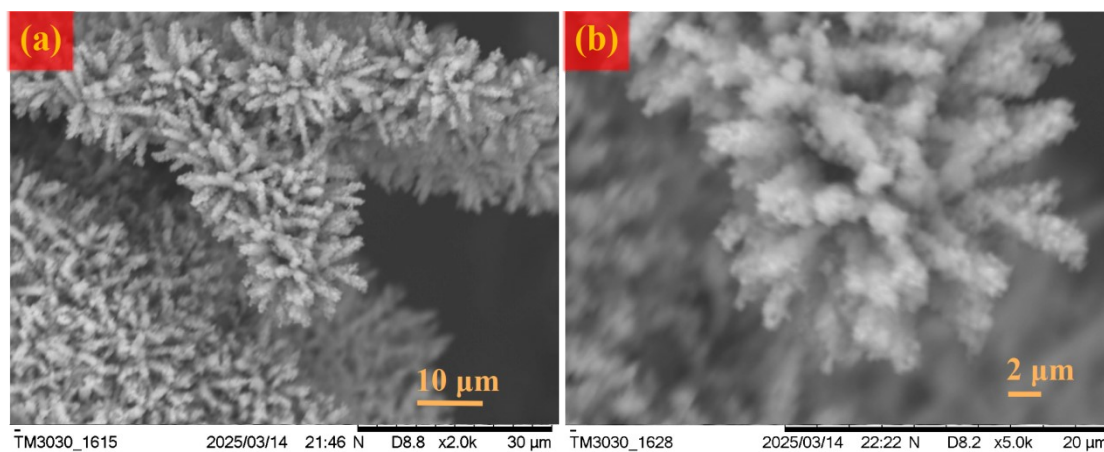

283

284 **Fig. S22.** SEM images of FeP-CoP@rGA/NF after stability test at (a) 10 μm and (b)

285

2 μm.

286

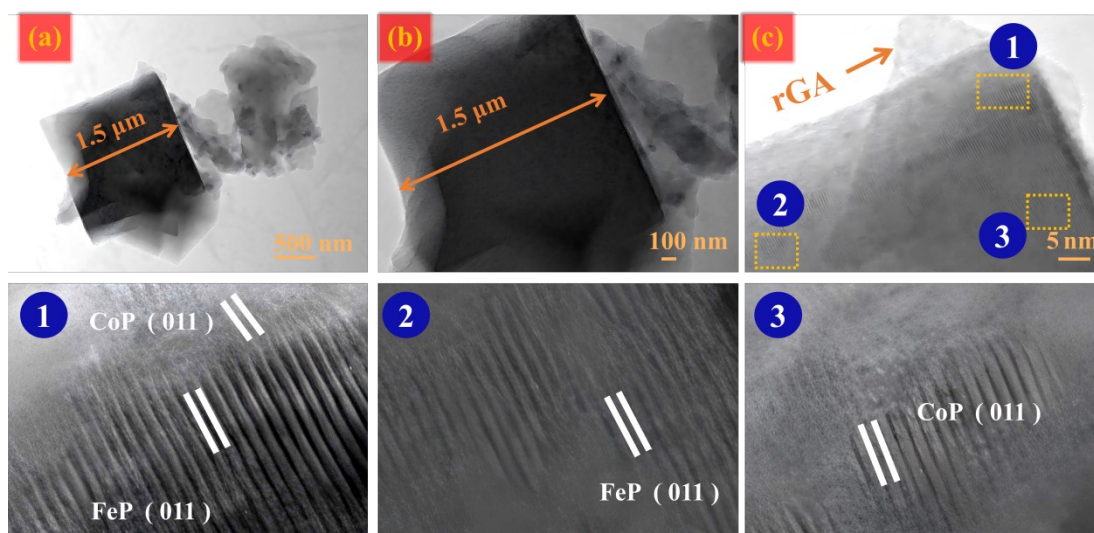

**Fig. S23.** TEM images of FeP-CoP@rGA/NF after 50h stability test.

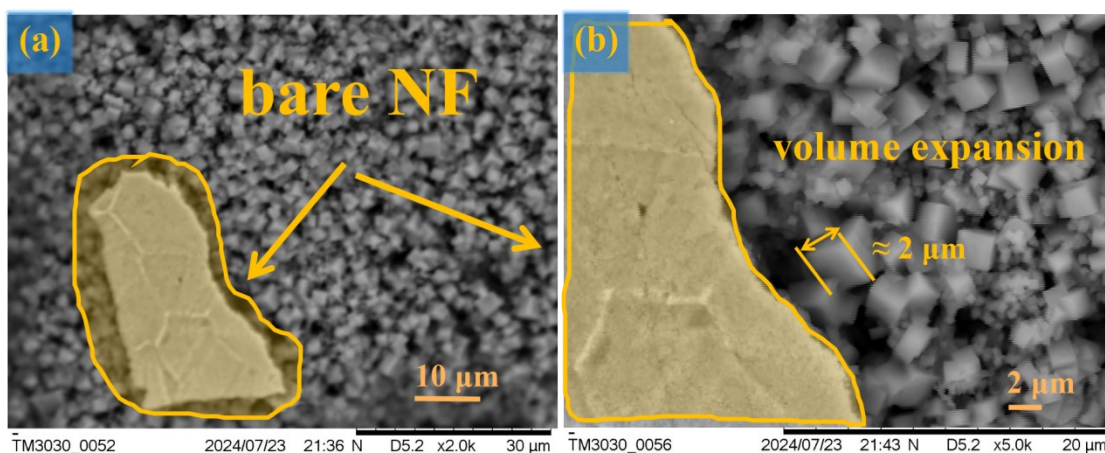

291  
 292 **Fig. S24.** SEM images of FeP-CoP/NF after stability test at (a) 10 μm and (b) 2μm.  
 293

294

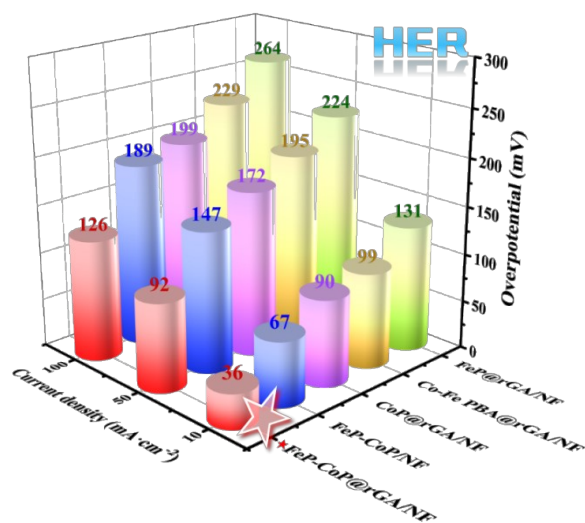

295

296

297

**Fig. S25.** Catalytic performance comparison of HER.

298

(a)

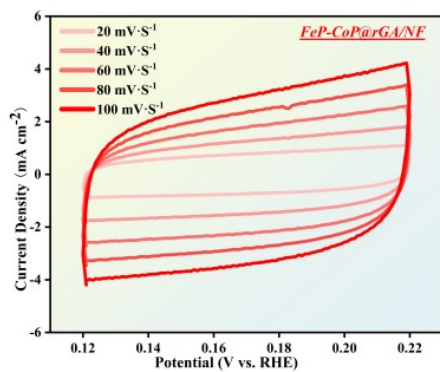

(b)

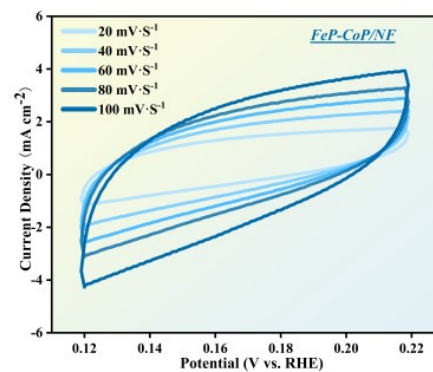

299

300

(c)

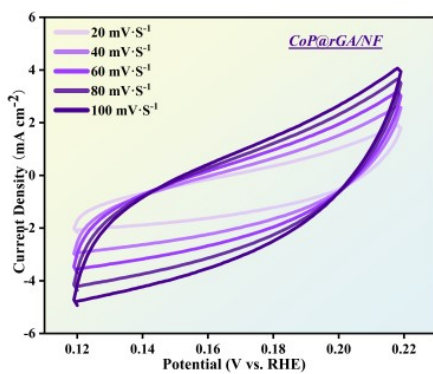

(d)

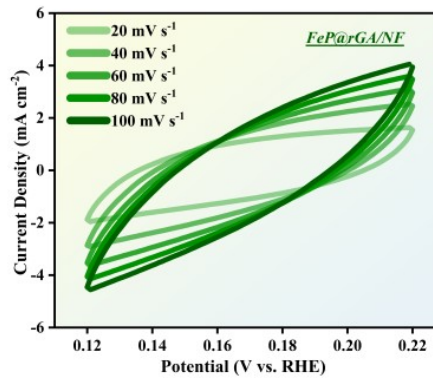

301

302 **Fig. S26.** Cyclic voltammograms of with the non-Faradaic potential regions from 20-

303 100 mV/s for (a) FeP-CoP@rGA/NF, (b) FeP-CoP/NF, (c) CoP@rGA/NF and (d)

304

FeP@rGA/NF.

305

306

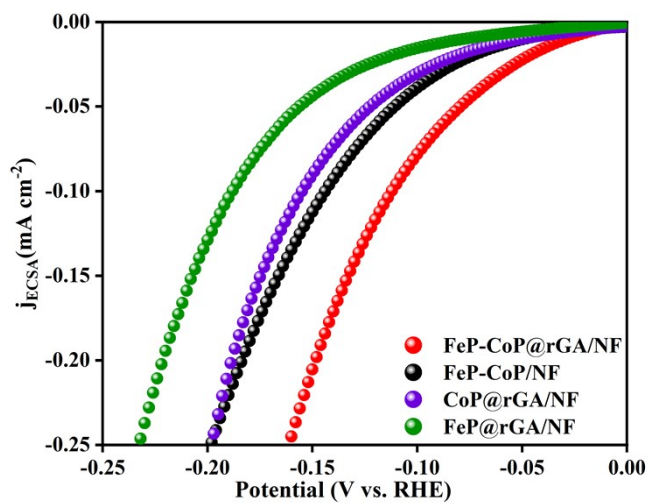

307

308 **Fig. S27.** Polarization curves of different catalysts for HER in 1M KOH electrolyte  
 309 normalized by ECSA. The specific capacitances ( $C_s$ ) were chosen as  $C_s=0.06 \text{ mF}$   
 310  $\text{cm}^{-2}$  in 1 M KOH based on typical reported values. The ECSA of the catalyst layer  
 311 can be calculated ( $\text{ECSA} = \text{Cdl}/C_s$ ).

312

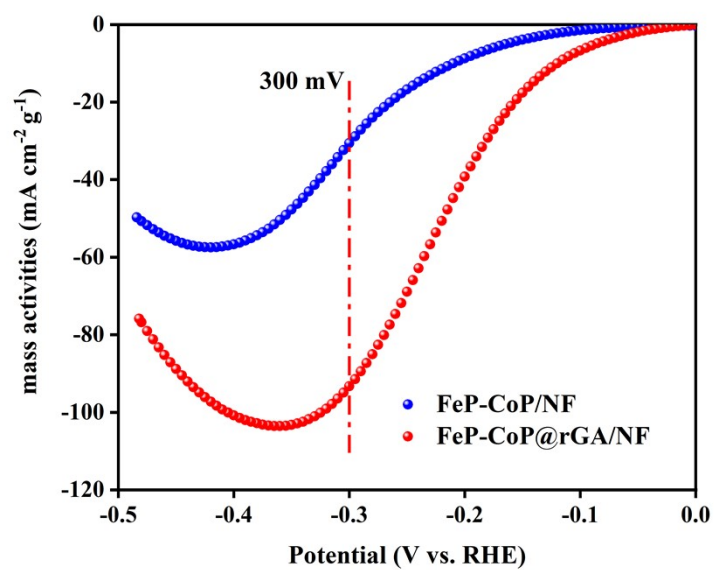

**Fig. S28.** Mass activities curves of OER derived from LSV curves

325  
326

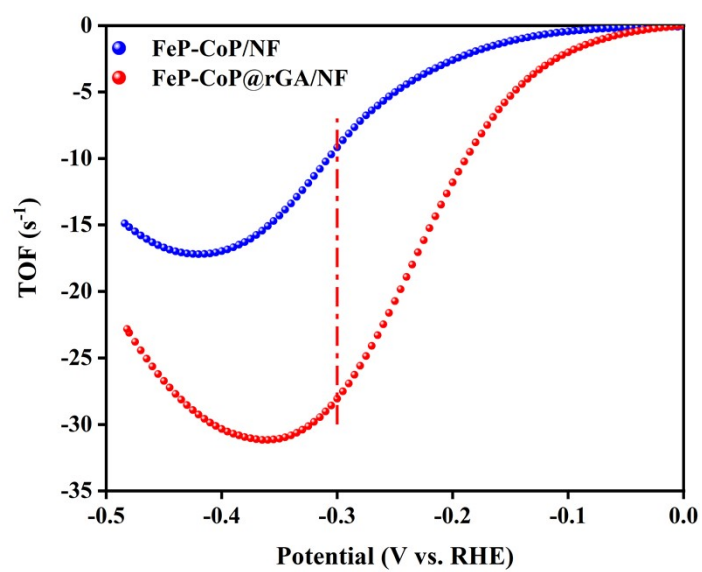

327  
328  
329

**Fig. S29.** TOF curves of OER derived from LSV curves.

330  
331  
332

333 (a)

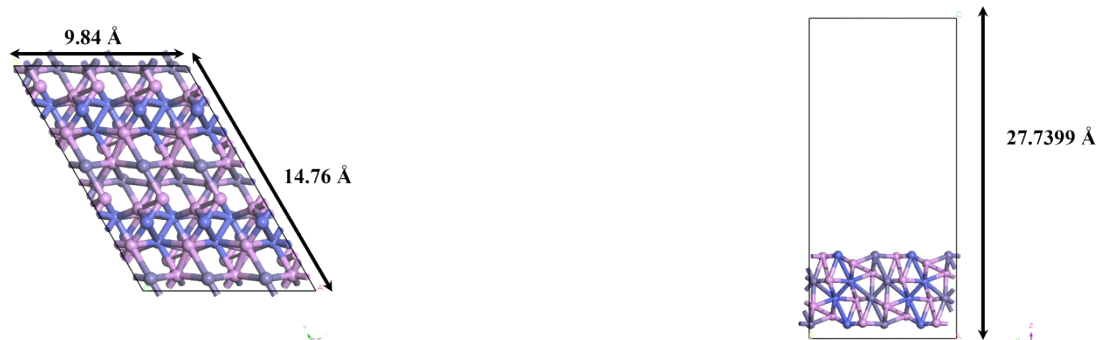

334

335 (b)

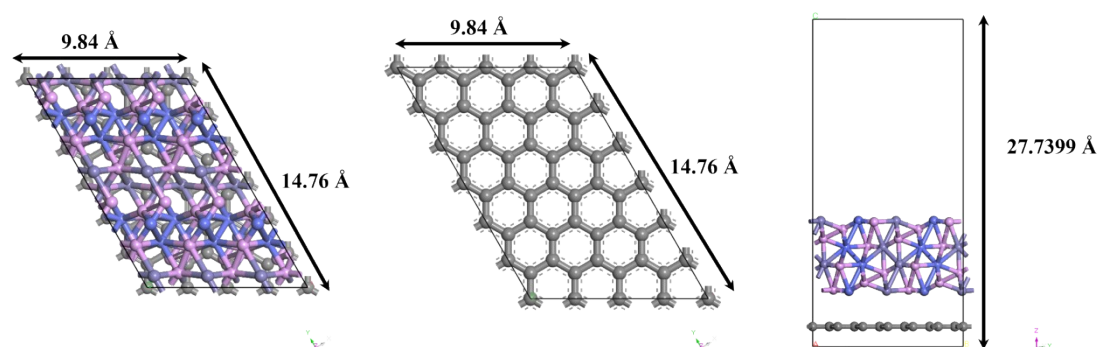

336

337 **Fig. S30.** The theoretical models of DFT. a. FeP-CoP b. FeP-CoP@rGA/NF.

338

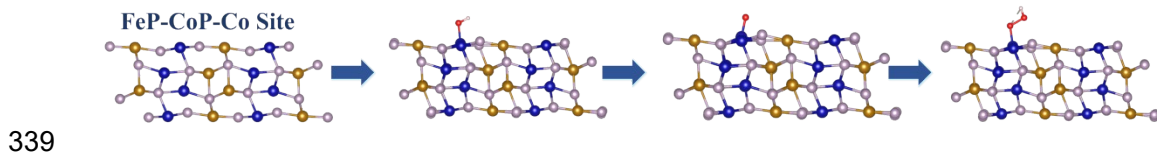

340 **Fig. S31.** The configuration of FeP-CoP-Co site(011) adsorbs (a) original (b) \*OH (c)  
341 \*O and (d) \*OOH.

342

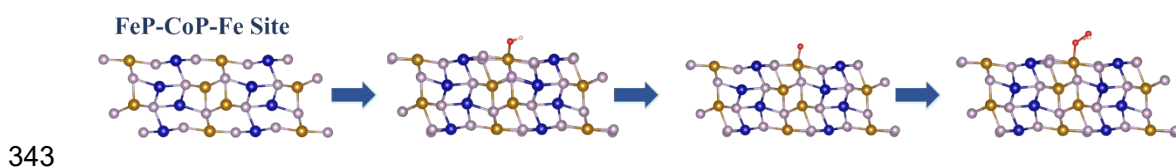

344 **Fig. S32.** The configuration of FeP-CoP-Fe site(011) adsorbs (a) original (b) \*OH (c)  
345 \*O and (d) \*OOH.

346

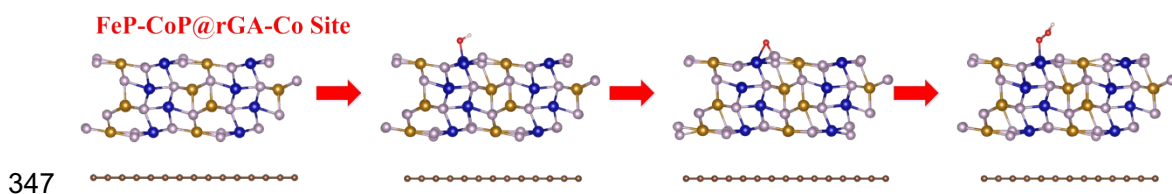

348 **Fig. S33.** The configuration of FeP-CoP@rGA-Co site(011) adsorbs (a) original (b)  
349 \*OH (c) \*O and (d) \*OOH.

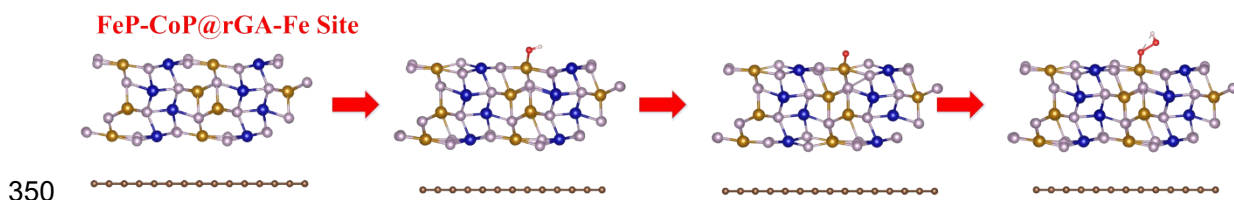

351 **Fig. S34.** The configuration of FeP-CoP@rGA-Fe site(011) adsorbs (a) original (b)  
352 \*OH (c) \*O and (d) \*OOH.

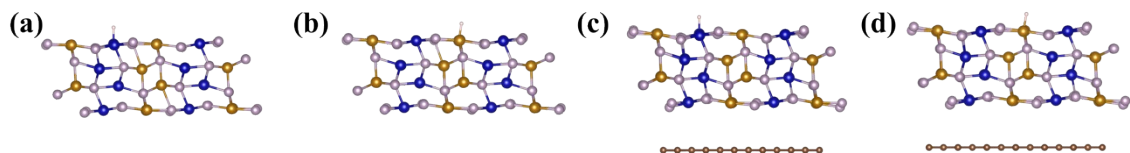

**Fig. S35.** The configuration of FeP-CoP and FeP-CoP@rGA \*H adsorb

### FeP-CoP

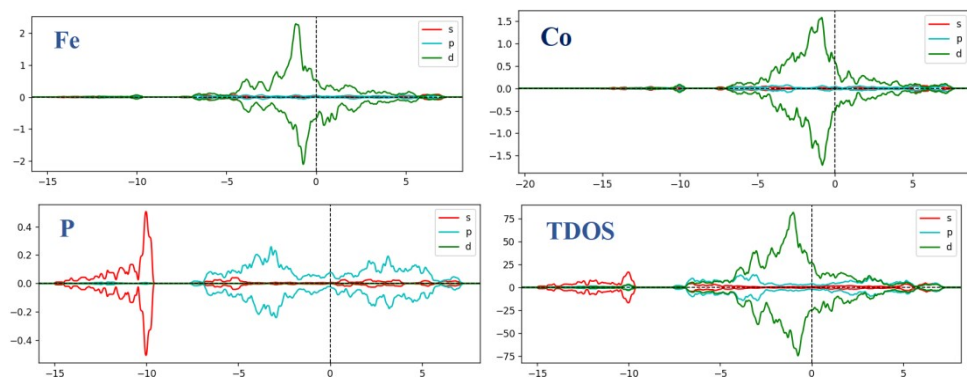

### FeP-CoP@rGA

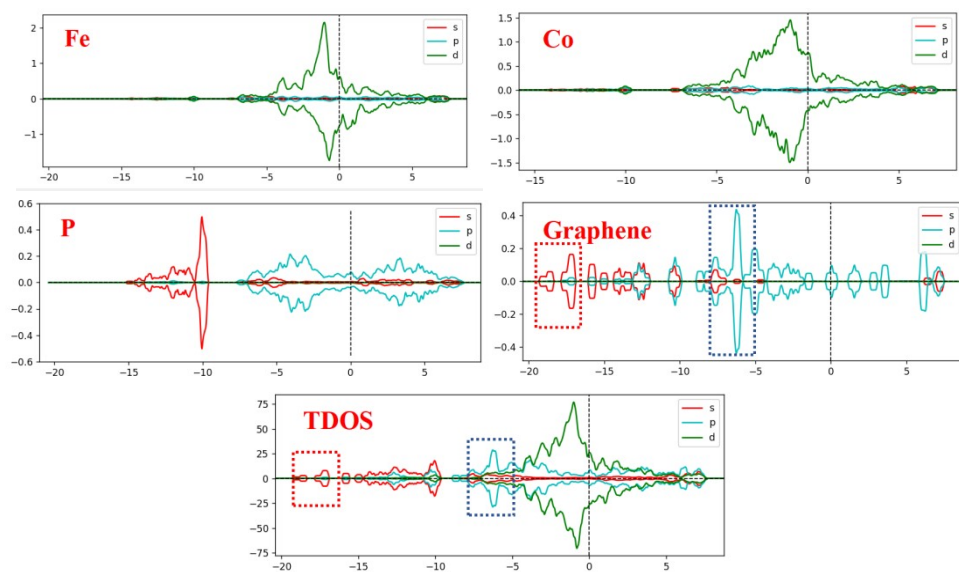

**Fig. S36.** The DOS of FeP-CoP and FeP-CoP@rGA.

367

368

369

370

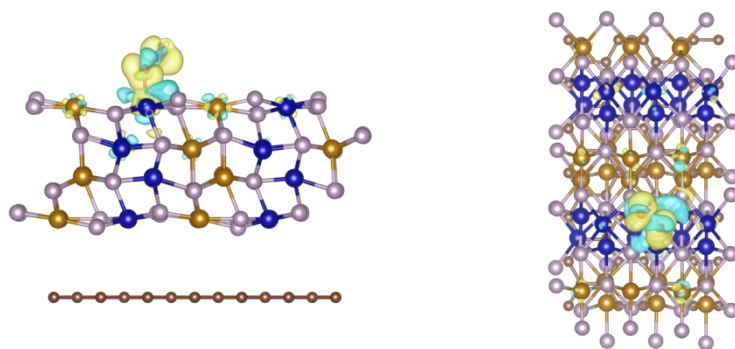

371

372 **Fig. S37.** The charge density difference and Bader of FeP-CoP@rGA on the Co  
373 site(\*OOH).

374

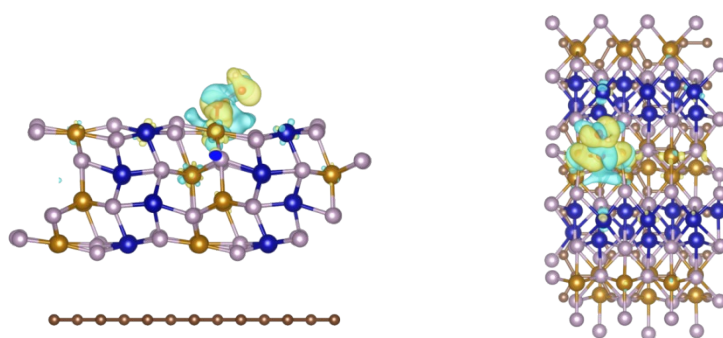

**Fig. S38.** The charge density difference and Bader of FeP-CoP@rGA on the Fe site(\*OOH).

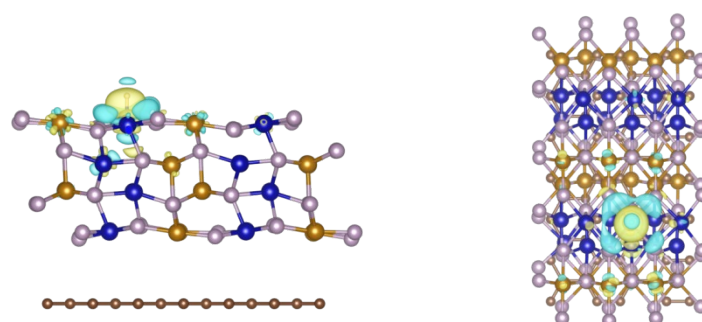

**Fig. S39.** The charge density difference and Bader of FeP-CoP@rGA on the Co site(\*H).

404

405

406

407

408

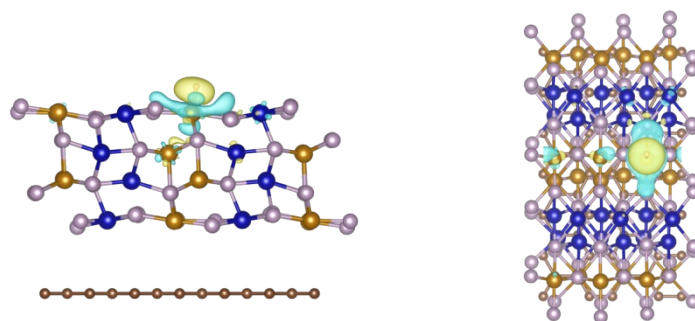

409

410 **Fig. S40.** The charge density difference and Bader of FeP-CoP@rGA on the Fe

411 site(\*H).

412

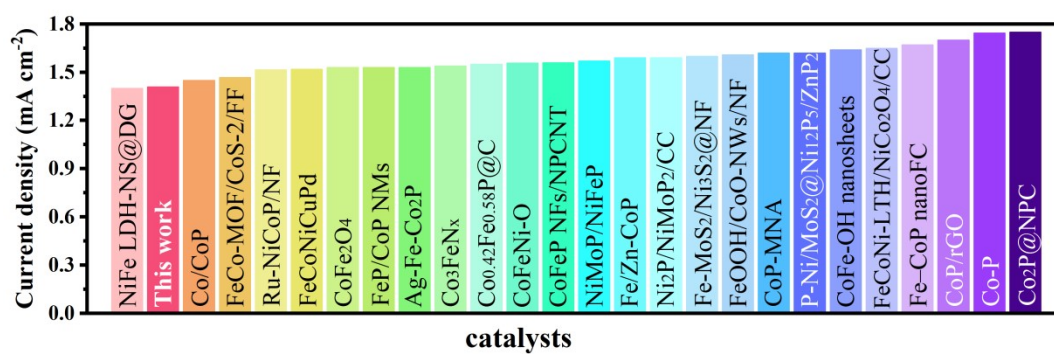

**Fig. S41.** The voltage of different catalysts for water electrolysis.

422

423

424

425

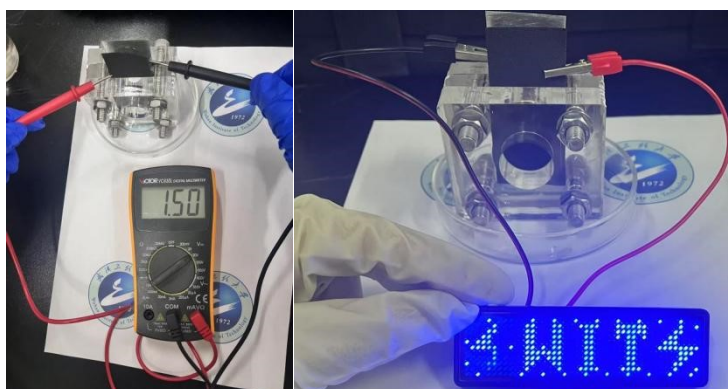

426

427 **Fig. S42.** Digital multimeter measuring the voltage output of zinc-air battery.

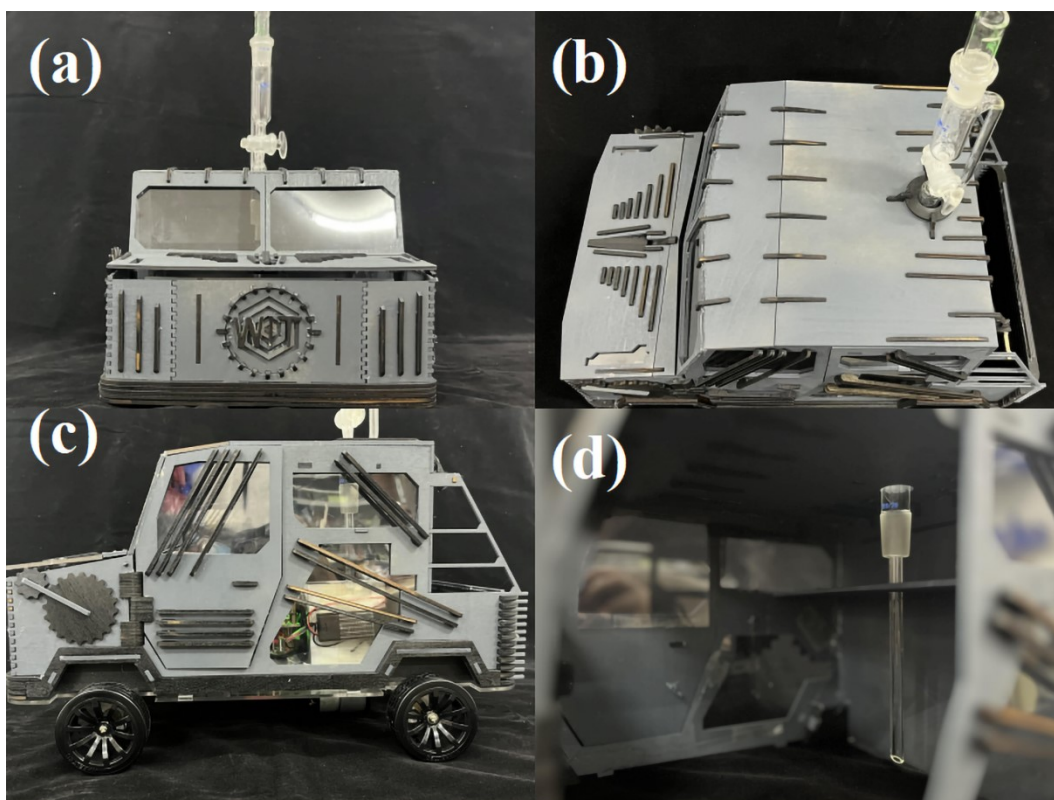

429

430 **Fig. S43.** Structure of the Zn-air battery car: (a) Front view; (b) Top view; (c) Right  
431 view; (d) Internal detailed view.

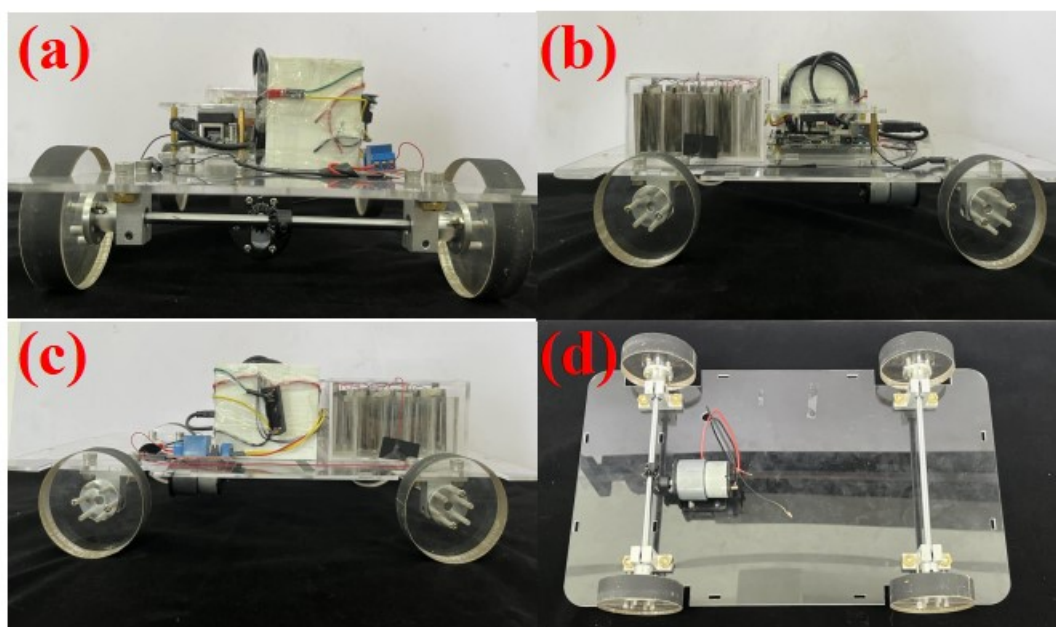

432

433 **Fig. S44.** Internal structure of the zinc-air battery-powered vehicle: (a) Front view, (b)  
434 Top view, (c) Right view, (d) Bottom view.

435  
436

**Table S1** Mass of the FeP-CoP@rGA (four parallel measurements)

| <b>catalyst</b>    | <b>Replicate 1</b> | <b>Replicate 2</b> | <b>Replicate 3</b> | <b>Replicate 4</b> | <b>Average</b> |
|--------------------|--------------------|--------------------|--------------------|--------------------|----------------|
|                    | <b>(g)</b>         | <b>(g)</b>         | <b>(g)</b>         | <b>(g)</b>         | <b>(g)</b>     |
| NF                 | 0.0708             | 0.0691             | 0.0699             | 0.0699             | 0.0699         |
| rGA/NF             | 0.0864             | 0.0833             | 0.0851             | 0.0849             | 0.0849         |
| FeP-<br>CoP@rGA/NF | 0.1807             | 0.1769             | 0.1792             | 0.1789             | 0.1789         |
| FeP-<br>CoP@rGA    | 0.1099             | 0.1078             | 0.1093             | 0.1090             | 0.1090         |

438 **Table S2** Mass of the FeP-CoP catalyst on NF (four parallel measurements)  
 439

| <b>catalyst</b> | <b>Replicate 1</b> | <b>Replicate 2</b> | <b>Replicate 3</b> | <b>Replicate 4</b> | <b>Average</b> |
|-----------------|--------------------|--------------------|--------------------|--------------------|----------------|
|                 | <b>(g)</b>         | <b>(g)</b>         | <b>(g)</b>         | <b>(g)</b>         | <b>(g)</b>     |
| NF              | 0.0698             | 0.0691             | 0.0697             | 0.0699             | 0.0696         |
| FeP-CoP/NF      | 0.1851             | 0.1843             | 0.1851             | 0.1849             | 0.1849         |
| FeP-CoP         | 0.1153             | 0.1152             | 0.1154             | 0.1150             | 0.1152         |

440  
441  
442

**Table S3** Co and Fe mass of the FeP-CoP@rGA obtained from ICP-OES measurements

| <b>FeP-CoP@rGA</b> | <b>Fe (mg)</b> | <b>Co (mg)</b> | <b>(Fe+Co) (mg)</b> | <b>(Fe+Co) wt%</b> |
|--------------------|----------------|----------------|---------------------|--------------------|
| m1                 | 1.78           | 2.31           | 4.09                | 40.5               |
| m2                 | 1.74           | 2.28           | 4.02                | 40.2               |
| m3                 | 1.76           | 2.29           | 4.05                | 40.5               |
| m3                 | 1.76           | 2.28           | 4.04                | 40.4               |
| <b>average</b>     | <b>1.76</b>    | <b>2.29</b>    | <b>4.05</b>         | <b>40.5</b>        |

443 **Table S4** Co and Fe mass of the FeP-CoP obtained from ICP-OES measurements  
 444

| <b>FeP-CoP</b> | <b>Fe<br/>(mg)</b> | <b>Co<br/>(mg)</b> | <b>(Fe+Co)<br/>(mg)</b> | <b>(Fe+Co)<br/>wt%</b> |
|----------------|--------------------|--------------------|-------------------------|------------------------|
| m1             | 2.98               | 3.04               | 6.02                    | 60.2                   |
| m2             | 2.77               | 2.94               | 5.71                    | 57.1                   |
| m3             | 2.88               | 2.95               | 5.81                    | 58.1                   |
| M4             | 2.88               | 3.01               | 5.91                    | 59.1                   |
| <b>average</b> | <b>2.88</b>        | <b>2.99</b>        | <b>5.87</b>             | <b>58.7</b>            |

445  
446

**Table S5.** The ECSA of different samples in OER and HER.

| Num. | catalyst       | OER                | HER                |
|------|----------------|--------------------|--------------------|
|      |                | (cm <sup>2</sup> ) | (cm <sup>2</sup> ) |
| 1    | FeP-CoP@rGA/NF | 1055               | 505                |
| 2    | FeP-CoP/NF     | 518.33             | 301.67             |
| 3    | FeP@rGA/NF     | 673.33             | 256.67             |
| 4    | CoP@rGA/NF     | 283.33             | 148.33             |

448 **Table S6.** At 50 mA cm<sup>-2</sup>, comparison of stability duration for iron-cobalt-based  
 449 catalysts in recent years.  
 450  
 451

| Num. | catalyst                                       | Time (h) | Current Density        | Ref.      |
|------|------------------------------------------------|----------|------------------------|-----------|
|      |                                                |          | (mA cm <sup>-2</sup> ) |           |
| 1    | FeP-CoP@rGA/NF                                 | 50       | 50                     | This work |
| 2    | FeP/CoP-2D                                     | 50       | 20                     | 2         |
| 3    | FeCo-MOF/CoS-2/FF                              | 24       | 10                     | 3         |
| 4    | CoNiP/CoNi-G/CMF-2                             | 12       | 10                     | 4         |
| 5    | MoS <sub>2</sub> /CoFe@NC                      | 24       | 20                     | 5         |
| 6    | Fe-Co-P/NF                                     | 24       | 40                     | 6         |
| 7    | Fe <sub>3</sub> N@Co <sub>4</sub> N@CoFe alloy | 20       | 50                     | 7         |
| 8    | CoP/FeP@PCN                                    | 10       | 10                     | 8         |
| 9    | CuO@CoNiS NRs                                  | 36       | 50                     | 9         |
| 10   | NiCo <sub>2</sub> S <sub>4</sub> /NiFeP/NF     | 24       | 10                     | 10        |
| 11   | Co <sub>0.42</sub> Fe <sub>0.58</sub> P@C      | 18       | 10                     | 11        |

452

**Table S7.** At 50 mA cm<sup>-2</sup>, comparison of OER and HER performance of Fe-Co based catalysts in recent years.

| Num. | Catalysts                                                             | HER                                                     | OER                                                      | Electrolyte | Ref.      |
|------|-----------------------------------------------------------------------|---------------------------------------------------------|----------------------------------------------------------|-------------|-----------|
|      |                                                                       | Overpotential @ j<br>(mV @ 50mA cm <sup>-2</sup> )<br>≈ | Overpotential @ j<br>(mV @ 50 mA cm <sup>-2</sup> )<br>≈ |             |           |
| 1    | FeP-CoP@rGA/NF                                                        | 191                                                     | 210                                                      | 1M KOH      | This work |
| 2    | Mo-Co-Fe-MOF                                                          | 317                                                     | 296                                                      | 1M KOH      | 12        |
| 3    | CoFeZr/NF                                                             | 248                                                     | 267                                                      | 1M KOH      | 13        |
| 4    | Cu <sub>0.50</sub> Fe <sub>0.50</sub> /NF                             | 234                                                     | 270                                                      | 1M KOH      | 14        |
| 5    | Co <sub>0.42</sub> Fe <sub>0.58</sub> P@C                             | 229                                                     | 302                                                      | 1M KOH      | 11        |
| 6    | CoFe@N-C-700°C                                                        | 204                                                     | 348                                                      | 1M KOH      | 15        |
| 7    | FeNi<br>LDH/V <sub>2</sub> CT <sub>x</sub> /NF                        | 274                                                     | 265                                                      | 1M KOH      | 16        |
| 8    | CoNiP/CoNi-<br>G/CMF-2                                                | 290                                                     | 385                                                      | 1M KOH      | 4         |
| 9    | MoS <sub>2</sub> /CoFe@NC                                             | 331                                                     | 406                                                      | 1M KOH      | 5         |
| 10   | Fe-CoP nanoFC                                                         | 347                                                     | 320                                                      | 1M KOH      | 17        |
| 11   | S-NiFe/NFF                                                            | 285                                                     | 213                                                      | 1M KOH      | 18        |
| 12   | FeS <sub>2</sub> /FeOOH@NF                                            | 253                                                     | 283                                                      | 1M KOH      | 19        |
| 13   | Ni <sub>5</sub> P <sub>4</sub> /Ni <sub>2</sub> P/Fe <sub>2</sub> P-2 | 223                                                     | 263                                                      | 1M KOH      | 20        |
| 14   | FeOOH/CoO-<br>NWs/NF                                                  | 202                                                     | 249                                                      | 1M KOH      | 21        |
| 15   | MoS <sub>2</sub> @CoO                                                 | 274                                                     | 396                                                      | 1M KOH      | 22        |

455

456

457

458

**Table S8** Lattice parameters and Angle in the calculation.

|                   | <b>Lattice parameter</b> | <b>Angle</b>    |
|-------------------|--------------------------|-----------------|
| FeP-CoP@rGA (011) | 14.76×9.84×27.74 Å;      | a = b = c = 90° |
| FeP-CoP (011)     | 14.76×9.84×27.74 Å;      | a = b = c = 90° |

459

**Table S9** Computational Parameters for DFT Geometry Optimization.

| Parameter                  | Value                 | Description                                            |
|----------------------------|-----------------------|--------------------------------------------------------|
| Software                   | VASP                  | Vienna Ab initio Simulation Package                    |
| Functional                 | GGA-PBE               | Perdew-Burke-Ernzerhof exchange-correlation functional |
| Pseudopotential            | PAW                   | Projector Augmented-Wave                               |
| Cutoff Energy (ENCUT)      | 400 eV                | Plane-wave basis set kinetic energy cutoff             |
| k-point                    | $1 \times 1 \times 1$ | Used for the large supercell model                     |
| SCF Convergence (EDIFF)    | $1 \times 10^{-5}$    | Energy tolerance for electronic loop                   |
| Force Convergence (EDIFFG) | -0.01 eV/Å            | Force tolerance on all atoms for ionic relaxation      |
| Smearing Method (ISMEAR)   | 0                     |                                                        |
| Smearing Width (SIGMA)     | 0.05                  |                                                        |
| Algorithm (IBRION)         | 2                     | Conjugate gradient algorithm for ionic relaxation      |

462 **Table S10** Computational Parameters for DFT Static Self-Consistent Field

463 Calculations.

| Category               | Parameter       | Value / Setting       | Description                                                                                               |
|------------------------|-----------------|-----------------------|-----------------------------------------------------------------------------------------------------------|
| <b>Basic Setup</b>     | Functional      | GGA-PBE               | Exchange-correlation functional                                                                           |
|                        | Pseudopotential | PAW                   | Projector Augmented-Wave method                                                                           |
|                        | ENCUT           | 400 eV                | Cut-off energy for plane wave basis set, in eV                                                            |
|                        | PREC            | Accurate              | (Precision level: Normal or Accurate, set Accurate when perform structure lattice relaxation calculation) |
| <b>SCF Convergence</b> | EDIFF           | $1 \times 10^{-8}$ eV | SCF energy convergence, in eV                                                                             |
|                        | NELM            | 60                    | Maximum number of electronic steps                                                                        |
| <b>DOS Calculation</b> | k-mesh Sampling | $3 \times 3 \times 1$ | KPOINTS                                                                                                   |
|                        | ISMear          | -5                    | gaussian smearing method                                                                                  |
|                        | LORBIT          | 11                    | Enables projected DOS (PDOS) output                                                                       |
|                        | NEDOS           | 2001                  | DOSCAR points                                                                                             |
| <b>I/O Settings</b>    | ISTART          | 1                     | Read existing WAVECAR                                                                                     |
|                        | ICHARG          | 2                     | Non-self-consistent: GGA/LDA band structures                                                              |

464

465

466 **Table S11.** Energy values for H<sub>2</sub>O, O<sub>2</sub> and H<sub>2</sub>.

467

|                     | Pressure (bar) | E <sub>DFT</sub> (eV) | ZPE (eV) | G (eV)  | Temperature (k) |
|---------------------|----------------|-----------------------|----------|---------|-----------------|
| O <sub>2</sub> (g)  | 1              | –                     | –        | -9.900  | 298.15          |
| H <sub>2</sub> (g)  | 1              | -6.760                | -0.045   | -6.818  | 298.15          |
| H <sub>2</sub> O(l) | 0.035          | -14.223               | -0.000   | -14.228 | 298.15          |

469

470

471 **Table S12.** The values used for zero-point energy corrections (eV).

472

|    | Different sites     | zero-point energy correction value |
|----|---------------------|------------------------------------|
| *H | FeP-CoP Fe site     | 0.166707                           |
| *H | FeP-CoP Co site     | 0.170521                           |
| *H | FeP-CoP@rGA Fe site | 0.163666                           |
| *H | FeP-CoP@rGA Co site | 0.170034                           |

473

474

475 **Table S13.** Adsorption free energies of \*H (eV) on different sites of FeP-CoP(011),  
 476 FeP-CoP@rGA(011) surface.

477  
 478

| Different sites     | $\Delta G_H$ |
|---------------------|--------------|
| FeP-CoP Fe site     | -1.16        |
| FeP-CoP Co site     | -0.61        |
| FeP-CoP@rGA Fe site | -1.13        |
| FeP-CoP@rGA Co site | -0.47        |

479

480 Yellow marked sites are the active sites on each surface.

481

482 **Table S14.** Adsorption free energies of \*OH, \*O and \*OOH (eV) on the active site  
 483 of FeP-CoP(011), FeP-CoP@rGA(011) surface.

484  
 485

|                     | $\Delta G_{*OH}$ | $\Delta G_{*O}$ | $\Delta G_{*OOH}$ |
|---------------------|------------------|-----------------|-------------------|
| FeP-CoP Fe site     | -0.361           | 0.266           | 2.908             |
| FeP-CoP Co site     | 1.295            | 0.917           | 4.143             |
| FeP-CoP@rGA Fe site | -0.753           | 0.995           | 2.476             |
| FeP-CoP@rGA Co site | 0.685            | 2.074           | 3.652             |

486  
 487

**Table S15.** The water splitting activity of FeP-CoP@rGA/NF and other bifunctional OER/HER Catalysts based on Fe-Co in alkaline electrolyte.

| Num. | catalyst                                                                 | electrolyte | cell voltage (V)<br>(10 mA cm <sup>-2</sup> ) | Ref.      |
|------|--------------------------------------------------------------------------|-------------|-----------------------------------------------|-----------|
| 1    | FeP/CoP@rGA/NF                                                           | 1M KOH      | 1.41                                          | This work |
| 2    | NiFe LDH-NS@DG                                                           | 1M KOH      | ~1.4                                          | 23        |
| 3    | Co/CoP                                                                   | 1M KOH      | 1.45                                          | 24        |
| 4    | FeCo-MOF/CoS-2/FF                                                        | 1M KOH      | 1.468                                         | 3         |
| 5    | Ru-NiCoP/NF                                                              | 1M KOH      | 1.515                                         | 25        |
| 6    | FeCoNiCuPd                                                               | 1M KOH      | 1.52                                          | 26        |
| 7    | CoFe <sub>2</sub> O <sub>4</sub>                                         | 1M KOH      | 1.53                                          | 27        |
| 8    | FeP/CoP NMs                                                              | 1M KOH      | 1.53                                          | 28        |
| 9    | Ag-Fe-Co <sub>2</sub> P                                                  | 1M KOH      | 1.53@100                                      | 29        |
| 10   | Co <sub>3</sub> FeN <sub>x</sub>                                         | 1M KOH      | 1.539                                         | 30        |
| 11   | Co <sub>0.42</sub> Fe <sub>0.58</sub> P@C                                | 1M KOH      | 1.55                                          | 11        |
| 12   | CoFeNi-O                                                                 | 1M KOH      | 1.558                                         | 31        |
| 13   | CoFeP NFs/NPCNT                                                          | 1M KOH      | 1.56                                          | 32        |
| 14   | NiMoP/NiFeP                                                              | 1M KOH      | 1.57                                          | 33        |
| 15   | Fe/Zn-CoP                                                                | 1M KOH      | 1.59                                          | 34        |
| 16   | Ni <sub>2</sub> P/NiMoP <sub>2</sub> /CC                                 | 1M KOH      | 1.59                                          | 35        |
| 17   | Fe-MoS <sub>2</sub> /Ni <sub>3</sub> S <sub>2</sub> @NF                  | 1M KOH      | 1.60                                          | 36        |
| 18   | FeOOH/CoO-NWs/NF                                                         | 1M KOH      | 1.61                                          | 21        |
| 19   | CoP-MNA                                                                  | 1M KOH      | 1.62                                          | 37        |
| 20   | P-Ni/MoS <sub>2</sub> @Ni <sub>12</sub> P <sub>5</sub> /ZnP <sub>2</sub> | 1M KOH      | 1.62@50                                       | 38        |
| 21   | CoFe-OH nanosheets                                                       | 1M KOH      | 1.64                                          | 39        |
| 22   | FeCoNi-LTH/NiCo <sub>2</sub> O <sub>4</sub> /CC                          | 1M KOH      | 1.65@50                                       | 40        |
| 23   | Fe-CoP nanoFC                                                            | 1M KOH      | 1.671                                         | 17        |

|    |                       |        |           |    |
|----|-----------------------|--------|-----------|----|
| 24 | CoP/rGO               | 1M KOH | 1.7       | 41 |
| 25 | Co-P                  | 1M KOH | 1.744@100 | 42 |
| 26 | Co <sub>2</sub> P@NPC | 1M KOH | 1.75      | 43 |

---

491

492 **Table S16.** The Specifications of GO (H<sub>2</sub>O wt% ≤6)  
 493

|           | Tap<br>density | pH<br>1% concentration | C(wt%)<br>Elementanalysis | Particle<br>Size D50 (μm)<br>laserparticle analyzer |
|-----------|----------------|------------------------|---------------------------|-----------------------------------------------------|
| <b>GO</b> | 0.7-1.2        | 1.6-2.6                | 45-55                     | 15-30                                               |

494  
 495  
 496  
 497



500 **References**

- 501 1 X. Ma, Y. Zhou, S. Zhang, W. Lei, Y. Zhao, C. Shan, 3d – 5d Orbital Hybridization  
 502 in Nanoflower - Like High - Entropy Alloy for Highly Efficient Overall Water  
 503 Splitting at High Current Density, *Small* 21 (2025) 2411394.  
 504 <https://doi.org/10.1002/sml.202411394>.
- 505 2 S. Fu, C. Peng, Y. Luo, L. Cheng, X. Yang, Z. Jiao, Modulating space charge of  
 506 FeP/CoP p-n heterojunction for boosting oxygen evolution reaction, *J. Colloid*  
 507 *Interface Sci.* (2024). <https://doi.org/10.1016/j.jcis.2024.03.060>.
- 508 3 Y. Xu, Q. Zhang, N. Wang, L. Huang, X. Zhang, H. Lin, Y. Xu, J. Chen, Y. Jiao,  
 509 Quasi-FeCo-MOF/CoS amorphous Nanosheets: A stable and highly active catalyst  
 510 for electrocatalytic water splitting and monosaccharide oxidation, *Chem. Eng. J.* 497  
 511 (2024) 154837. <https://doi.org/10.1016/j.cej.2024.154837>.
- 512 4 D. Wei, L. Chen, L. Tian, S. Ramakrishna, D. Ji, Hierarchically Structured  
 513 CoNiP/CoNi Nanoparticle/Graphene/Carbon Foams as Effective Bifunctional  
 514 Electrocatalysts for HER and OER, *Ind. Eng. Chem. Res.* 62 (2023) 4987-4994.  
 515 <https://doi.org/10.1021/acs.iecr.3c00224>.
- 516 5 W. Ma, W. Li, H. Zhang, Y. Wang, N-doped carbon wrapped CoFe alloy  
 517 nanoparticles with MoS<sub>2</sub> nanosheets as electrocatalyst for hydrogen and oxygen  
 518 evolution reactions, *Int. J. Hydrogen Energy.* 48 (2023) 22032-22043.  
 519 <https://doi.org/10.1016/j.ijhydene.2023.03.095>.
- 520 6 H. Xu, J. Zhu, P. Wang, D. Chen, C. Zhang, M. Xiao, Q. Ma, H. Bai, R. Qin, J. Ma,  
 521 S. Mu, Fe-Co-P multi-heterostructure arrays for efficient electrocatalytic water  
 522 splitting, *J. Mater. Chem. A.* (2021). <https://doi.org/10.1039/d1ta06603j>.
- 523 7 C. Zihao, L. Xizhuang, W. Peng, Z. Peng, Z. Qianqian, W. Zeyan, Z. Zhaoke, L.  
 524 Yuanyuan, D. Ying, H. Baibiao, In situ integration of Fe<sub>3</sub>N@Co<sub>4</sub>N@CoFe alloy  
 525 nanoparticles as efficient and stable electrocatalyst for overall water splitting,

Electrochim. Acta. 395 (2021) 139218.  
<https://doi.org/10.1016/j.electacta.2021.139218>.

8 K. Chen, L. Wang, J. Long, F. Zhao, L. Kang, Petaloid CoP/FeP Composites: Efficiently bifunctional cathode electrochemical oxygen catalysts for aqueous and Solid-State Zinc-Air batteries, Chem. Eng. J. 496 (2024) 153820.  
<https://doi.org/10.1016/j.cej.2024.153820>.

9 Y. Jiangtao, X. Haicheng, Z. Guohong, W. Rui, Y. Jiale, L. Xiaohong, L. Yuping, H. Peide, The 3D core-shell heterostructure catalysts by CoNiS nanosheets interfacial assembled on CuO nanorods for efficient water electrolysis, Appl. Surf. Sci. 570 (2021) 151181. <https://doi.org/10.1016/j.apsusc.2021.151181>.

10 J. Jing, L. Fengyan, S. Hui, G. Yangqin, L. Ning, G. Lei, Flower-like NiCo<sub>2</sub>S<sub>4</sub>/NiFeP/NF composite material as an effective electrocatalyst with high overall water splitting performance, Chin. Chem. Lett. 33 (2021) 4367-4374.  
<https://doi.org/10.1016/j.cclet.2021.12.028>.

11 Y. Deng, Y. Cao, Y. Xia, X. Xi, Y. Wang, W. Jiang, D. Yang, A. Dong, T. Li, Self-Templated Synthesis of CoFeP@C Cage-In-Cage Superlattices for Enhanced Electrocatalytic Water Splitting, Adv. Energy Mater. (2022)  
<https://doi.org/10.1002/aenm.202202394>.

12 Y. Hai, X. Shengquan, Y. Jiawei, L. Jianguo, T. Wei, Y. Jianfei, W. Junyi, Z. Min, W. Congrong, Z. Miao, H. Gang, Y. Lei, Co<sub>3</sub>Fe<sub>7</sub>/Mo<sub>2</sub>C co-embedded in N-codoped porous carbon with accelerated kinetics for OER and HER, Colloids Surf. A. 645 (2022) 128953. <https://doi.org/10.1016/j.colsurfa.2022.128953>.

13 W. Liu, K. Jiang, Y. Hu, Q. Li, Y. Deng, J. Bao, Y. Lei, Zr-doped CoFe-Layered Double Hydroxides for highly efficient seawater electrolysis, J. Colloid Interface Sci. 604 (2021) 767-775. <https://doi.org/10.1016/j.jcis.2021.07.022>

- 14 A.I. Inamdar, H.S. Chavan, B. Hou, C.H. Lee, S.U. Lee, S. Cha, H. Kim, H. Im, A Robust Nonprecious CuFe Composite as a Highly Efficient Bifunctional Catalyst for Overall Electrochemical Water Splitting, *Small*. 16 (2019) 1905884. <https://doi.org/10.1002/sml.201905884>.
- 15 X. Zeng, M.J. Jang, S.M. Choi, H.-S. Cho, C.-H. Kim, N.V. Myung, Y. Yin, Single-crystalline CoFe nanoparticles encapsulated in N-doped carbon nanotubes as a bifunctional catalyst for water splitting, *Mater. Chem. Front.* 4 (2020) 2307-2313. <https://doi.org/10.1039/d0qm00126k>.
- 16 L. Yang, T. Yang, Y. Chen, Y. Zheng, E. Wang, Z. Du, K.-C. Chou, X. Hou, FeNi LDH/V<sub>2</sub>CT<sub>x</sub>/NF as self-supported bifunctional electrocatalyst for highly effective overall water splitting, *Nanomaterials* 12 (2022) 2640. <https://doi.org/10.3390/nano12152640>.
- 17 Y. Yuan, Y. Yang, H. Xie, X. Zhong, R. Wang, Z. Xu, Trace Fe doping improved the OER and HER catalytic performance of CoP hollow nanoflower clusters, *Int. J. Hydrogen Energy* 90 (2024) 1401–1410. <https://doi.org/10.1016/j.ijhydene.2024.10.122>.
- 18 L. Wu, J. Feng, Z. Zou, K. Song, C. Zeng, Formation of feathery-shaped dual-function S-doped FeNi-MOFs to achieve advanced electrocatalytic activity for OER and HER, *J. Electroanal. Chem.* 935 (2023) 117365. <https://doi.org/10.1016/j.jelechem.2023.117365>.
- 19 Y. Yang, Y. Chen, Y. Xiong, Y. He, Q. Sun, D. Xu, Z. Hu, Self-supported monometallic FeS<sub>2</sub>/FeOOH-ZnO@NF with abundant oxygen vacancies as efficient and stable electrocatalysts for the OER and HER, *J. Alloys Compd.* 991 (2024) 174525. <https://doi.org/10.1016/j.jallcom.2024.174525>.
- 20 S. Sun, C. Zhang, M. Ran, Y. Zheng, C. Li, Y. Jiang, X. Yan, Fe-doped promotes phosphorization and dispersibility of Ni catalysts for efficient and stable HER and

- 577 OER, Int. J. Hydrogen Energy 63 (2024) 133-141.  
 578 <https://doi.org/10.1016/j.ijhydene.2024.03.179>.
- 579 21 H. Zhang, W. Li, X. Feng, N. Chen, H. Zhang, X. Zhao, L. Wang, Z. Li, Interfacial  
 580 FeOOH/CoO nanowires array improves electrocatalytic water splitting, J. Solid State  
 581 Chem. 298 (2021) 122156. <https://doi.org/10.1016/j.jssc.2021.122156>.
- 582 22 P. Cheng, C. Yuan, Q. Zhou, X. Hu, J. Li, X. Lin, X. Wang, M. Jin, L. Shui, X.  
 583 Gao, R. Nötzel, G. Zhou, Z. Zhang, J. Liu, Core-shell MoS<sub>2</sub>@CoO electrocatalyst  
 584 for water splitting in neutral and alkaline solutions, J. Phys. Chem. C 123 (2019)  
 585 5833-5839. <https://doi.org/10.1021/acs.jpcc.8b10954>.
- 586 23 Y. Jia, L. Zhang, G. Gao, H. Chen, B. Wang, J. Zhou, M.T. Soo, M. Hong, X. Yan,  
 587 G. Qian, J. Zou, A. Du, X. Yao, A heterostructure coupling of exfoliated Ni-Fe  
 588 hydroxide nanosheet and defective graphene as a bifunctional electrocatalyst for  
 589 overall water splitting, Adv. Mater. 29 (2017) 1700017.  
 590 <https://doi.org/10.1002/adma.201700017>.
- 591 24 J. Lin, Y. Yan, T. Liu, J. Cao, X. Zhou, J. Feng, J. Qi, Optimize the electrocatalytic  
 592 performances of NiCoP for water splitting by the synergic effect of S dopant and P  
 593 vacancy, Int. J. Hydrogen Energy 45 (2020) 16161-16168.  
 594 <https://doi.org/10.1016/j.ijhydene.2020.04.069>.
- 595 25 D. Chen, R. Lu, Z. Pu, J. Zhu, H.-W. Li, F. Liu, S. Hu, X. Luo, J. Wu, Y. Zhao, S.  
 596 Mu, Ru-doped 3D flower-like bimetallic phosphide with a climbing effect on overall  
 597 water splitting, Appl. Catal., B 279 (2020) 119396.  
 598 <https://doi.org/10.1016/j.apcatb.2020.119396>.
- 599 26 S. Wang, B. Xu, W. Huo, H. Feng, X. Zhou, F. Fang, Z. Xie, J.K. Shang, J. Jiang,  
 600 Efficient FeCoNiCuPd thin-film electrocatalyst for alkaline oxygen and hydrogen  
 601 evolution reactions, Appl. Catal., B 313 (2022) 121472.  
 602 <https://doi.org/10.1016/j.apcatb.2022.121472>.

- 27 C. Guo, X. Liu, L. Gao, X. Ma, M. Zhao, J. Zhou, X. Kuang, W. Deng, X. Sun, Q. Wei, Oxygen defect engineering in cobalt iron oxide nanosheets for promoted overall water splitting, *J. Mater. Chem. A* 7 (2019) 21704-21710. <https://doi.org/10.1039/C9TA06537G>.
- 28 Y. Du, L. Zhan, Y. Liu, R. Chen, Y. Fu, B. Li, L. Wang, Morphology engineering induces the increase of FeP/CoP heterointerface density for efficient alkaline water splitting driven by interfacial dual active sites, *Mater. Chem. Front.* 7 (2023) 4573-4583. <https://doi.org/10.1039/D3QM00489A>.
- 29 K.-L. Yan, X. Shang, L.-M. Zhang, B. Dong, Z.-Z. Liu, J.-Q. Chi, W.-K. Gao, Y.-M. Chai, C.-G. Liu, Boosting electrocatalytic activity of binary ag-e-doped co 2 P nanospheres as bifunctional electrocatalysts for overall water splitting, *Electrochim. Acta* 249 (2017) 16-25. <https://doi.org/10.1016/j.electacta.2017.07.180>.
- 30 Y. Wang, D. Liu, Z. Liu, C. Xie, J. Huo, S. Wang, Porous cobalt-iron nitride nanowires as excellent bifunctional electrocatalysts for overall water splitting, *Chem. Commun.* 52 (2016) 12614-12617. <https://doi.org/10.1039/C6CC06608A>.
- 31 L. Han, L. Guo, C. Dong, C. Zhang, H. Gao, J. Niu, Z. Peng, Z. Zhang, Ternary mesoporous cobalt-iron-nickel oxide efficiently catalyzing oxygen/hydrogen evolution reactions and overall water splitting, *Nano Res.* 12 (2019) 2281-2287. <https://doi.org/10.1007/s12274-019-2389-5>.
- 32 W. Li, Y. Chen, B. Yu, Y. Hu, X. Wang, D. Yang, 3D hollow Co-Fe-P nanoframes immobilized on N, P-doped CNT as an efficient electrocatalyst for overall water splitting, *Nanoscale* 11 (2019) 17031-17040. <https://doi.org/10.1039/C9NR05924E>.
- 33 H. Roh, H. Jung, H. Choi, J.W. Han, T. Park, S. Kim, K. Yong, Various metal (Fe, Mo, V, co)-doped Ni<sub>2</sub>P nanowire arrays as overall water splitting electrocatalysts and their applications in unassisted solar hydrogen production with STH 14 %, *Appl. Catal., B* 297 (2021) 120434. <https://doi.org/10.1016/j.apcatb.2021.120434>.

- 629 34 P. Wang, X. Liu, Y. Yan, J. Cao, J. Feng, J. Qi, Exploring CoP core-shell  
630 nanosheets by Fe and Zn dual cation doping as efficient electrocatalysts for overall  
631 water splitting, Catal. Sci. Technol. 10 (2020) 1395-1400.  
632 <https://doi.org/10.1039/C9CY02425E>.
- 633 35 L. Sun, S. Zhao, L. Sha, G. Zhuang, X. Wang, X. Han, Self-supported  
634 Ni<sub>2</sub>P/NiMoP<sub>2</sub> bimetallic phosphide with strong electronic interaction for efficient  
635 overall water splitting, J. Colloid Interface Sci. 637 (2023) 76-84.  
636 <https://doi.org/10.1016/j.jcis.2023.01.035>.
- 637 36 T. Wang, B. Li, P. Wang, M. Xu, D. Wang, Y. Wang, W. Zhang, C. Qu, M. Feng,  
638 Modulation of electronic structure of Ni<sub>3</sub>S<sub>2</sub> via Fe and Mo co-doping to enhance the  
639 bifunctional electrocatalytic activities for HER and OER, J. Colloid Interface Sci.  
640 672 (2024) 715-723. <https://doi.org/10.1016/j.jcis.2024.06.079>.
- 641 37 Y. Zhu, Y. Liu, T. Ren, Z. Yuan, Self-supported cobalt phosphide mesoporous  
642 nanorod arrays: a flexible and bifunctional electrode for highly active electrocatalytic  
643 water reduction and oxidation, Adv. Funct. Mater. 25 (2015) 7337-7347.  
644 <https://doi.org/10.1002/adfm.201503666>.
- 645 38 Z. Fu, Z. Jiang, T. Hu, Z.-J. Jiang, Hierarchical nanoassembly of  
646 Ni/MoS<sub>2</sub>@Ni<sub>12</sub>P<sub>5</sub>/ZnP<sub>2</sub> achieved by a plasma assisted phosphorization with highly  
647 improved electrocatalytic activity for overall water splitting, Electrochim. Acta 419  
648 (2022) 140392. <https://doi.org/10.1016/j.electacta.2022.140392>.
- 649 39 D. Li, G. Hao, W. Guo, G. Liu, J. Li, Q. Zhao, Highly efficient Ni nanotube arrays  
650 and Ni nanotube arrays coupled with NiFe layered-double-hydroxide electrocatalysts  
651 for overall water splitting, J. Power Sources 448 (2020) 227434.  
652 <https://doi.org/10.1016/j.jpowsour.2019.227434>.
- 653 40 Y. Liu, Y. Bai, Y. Han, Z. Yu, S. Zhang, G. Wang, J. Wei, Q. Wu, K. Sun, Self-  
654 supported hierarchical FeCoNi-LTH/NiCo<sub>2</sub>O<sub>4</sub>/CC electrodes with enhanced

655 bifunctional performance for efficient overall water splitting, ACS Appl. Mater.  
 656 Interfaces 9 (2017) 36917-36926. <https://doi.org/10.1021/acsami.7b12474>.

657 41 F. Lv, J. Feng, K. Wang, Z. Dou, W. Zhang, J. Zhou, C. Yang, M. Luo, Y. Yang,  
 658 Y. Li, P. Gao, S. Guo, Iridium-tungsten alloy nanodendrites as pH-universal water-  
 659 splitting electrocatalysts, ACS Cent. Sci. 4 (2018) 1244-1252.  
 660 <https://doi.org/10.1021/acscentsci.8b00426>.

661 42 N. Jiang, B. You, M. Sheng, Y. Sun, Electrodeposited cobalt-phosphorous-derived  
 662 films as competent bifunctional catalysts for overall water splitting, Angew. Chem.  
 663 127 (2015) 6349-6352. <https://doi.org/10.1002/ange.201501616>.

664 43 P. Wei, X. Sun, Z. He, F. Cheng, J. Xu, Q. Li, Y. Ren, J. He, J. Han, Y. Huang,  
 665 Adenosine triphosphate induced transition-metal phosphide nanostructures  
 666 encapsulated with N, P-codoped carbon toward electrochemical water splitting, Fuel  
 667 339 (2023) 127303. <https://doi.org/10.1016/j.fuel.2022.127303>.

668
